# Supplementary material for: Antidepressants can induce mutation and enhance persistence toward multiple antibiotics
Source: PubMed Central journal article supplement — Proc Natl Acad Sci U S A. 2023 Jan 23;120(5):e2208344120. doi: 10.1073/pnas.2208344120 (PMC9945972; doi:10.1073/pnas.2208344120), 2023-01-23
Supplement: pnas.2208344120.sapp.pdf [file pnas.2208344120.sapp.pdf]

## Supporting information

### **Antidepressants can induce mutation and enhance persistence towards multiple antibiotics**

Yue Wang<sup>1,2,a</sup>, Zhigang Yu<sup>1,a</sup>, Pengbo Ding<sup>1</sup>, Ji Lu<sup>1</sup>, Likai Mao<sup>1</sup>, Zhiguo Yuan<sup>1</sup>, Jan Engelstädter<sup>3</sup>, Mark A. Schembri<sup>4</sup>, Jianhua Guo<sup>1,\*</sup>

<sup>1</sup> Australian Centre for Water and Environmental Biotechnology (ACWEB, formerly AWMC), The University of Queensland, Brisbane, Queensland 4072, Australia

<sup>2</sup> School of Environmental Science and Engineering, Tiangong University, Tianjin, 300387, China

<sup>3</sup> School of Biological Sciences, The University of Queensland, Brisbane, Queensland 4072, Australia

<sup>4</sup> School of Chemistry and Molecular Biosciences, The University of Queensland, Brisbane, Queensland 4072, Australia

\* Corresponding author: [jianhua.guo@uq.edu.au](mailto:jianhua.guo@uq.edu.au) +61 7 3346 3222

<sup>a</sup> Y.W. and Z.Y. contributed equally to this work.

#### **This file includes:**

Supplementary Figures 1 to 8

Supplementary Tables 1 to 21

# Supplementary Figures

## A Sertraline

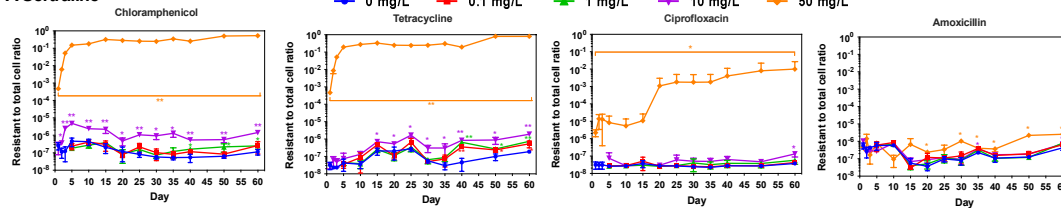

## B Duloxetine

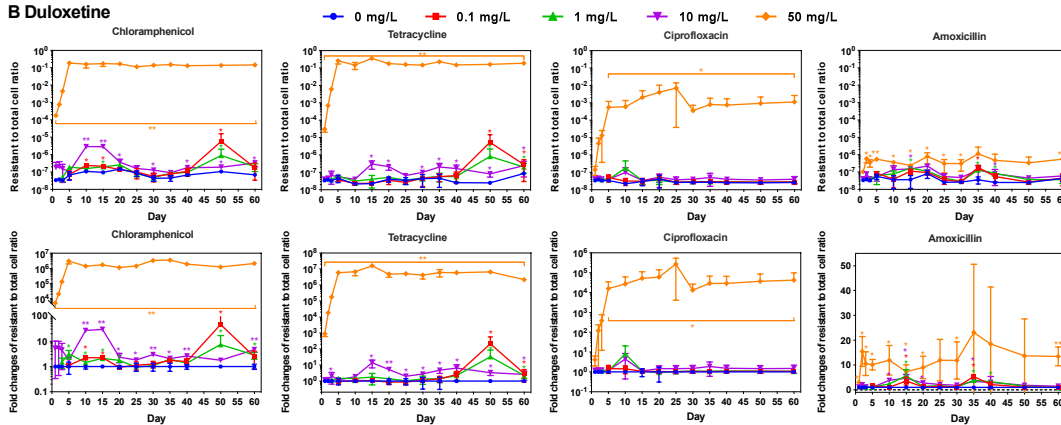

## C Bupropion

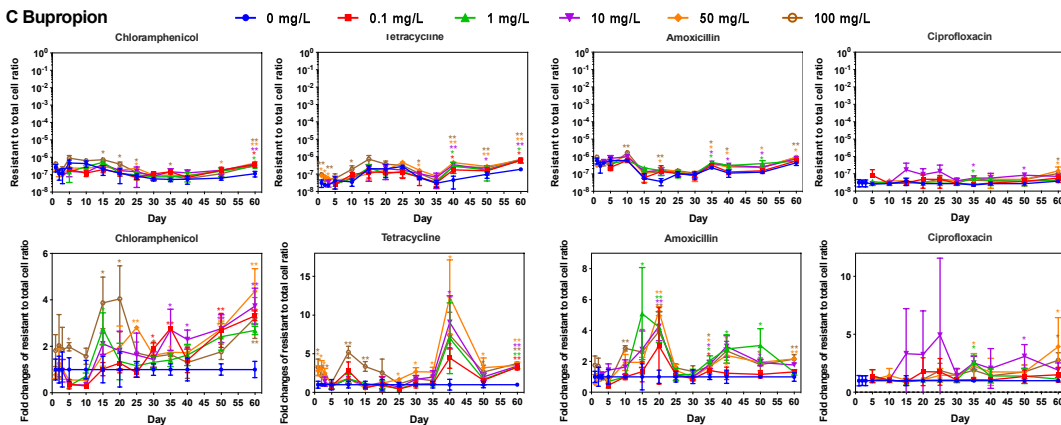

## D Escitalopram

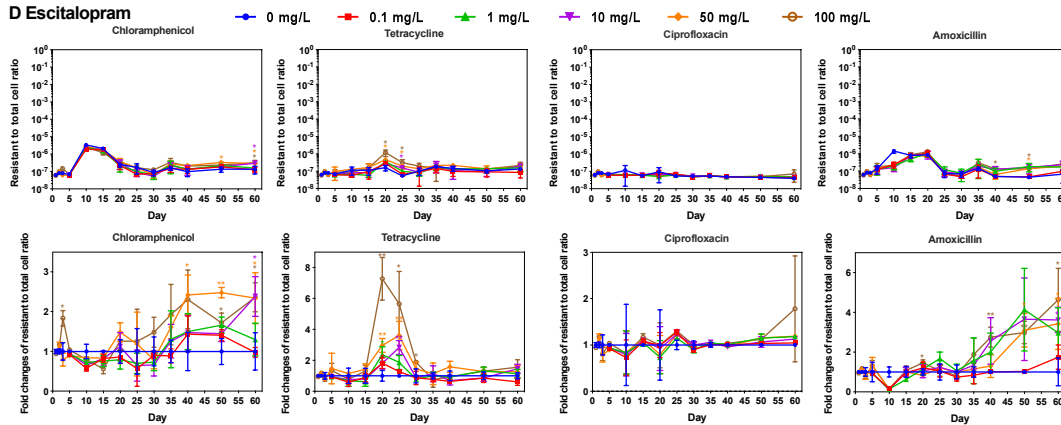

## E Agomelatine

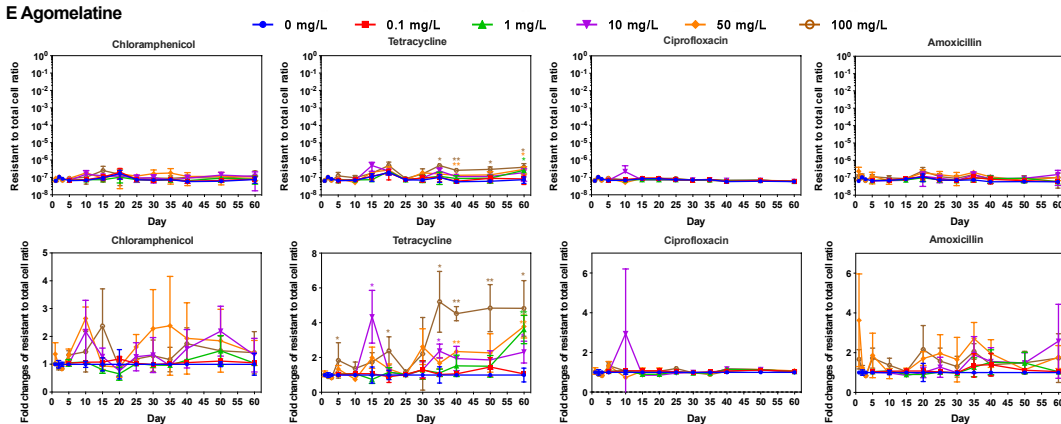

Figure S1. Mutation effects induced by five antidepressants on chloramphenicol-, tetracycline-, ciprofloxacin-, and amoxicillin- selective plates. Data are shown as mean  $\pm$  SD, n=3 independent experiments. Significant differences between antidepressant-dosed samples and the non-antidepressant control are analyzed by independent-sample *t*-test with Benjamini–Hochberg multiple comparison testing, \*  $P < 0.05$ , \*\*  $P < 0.01$ .

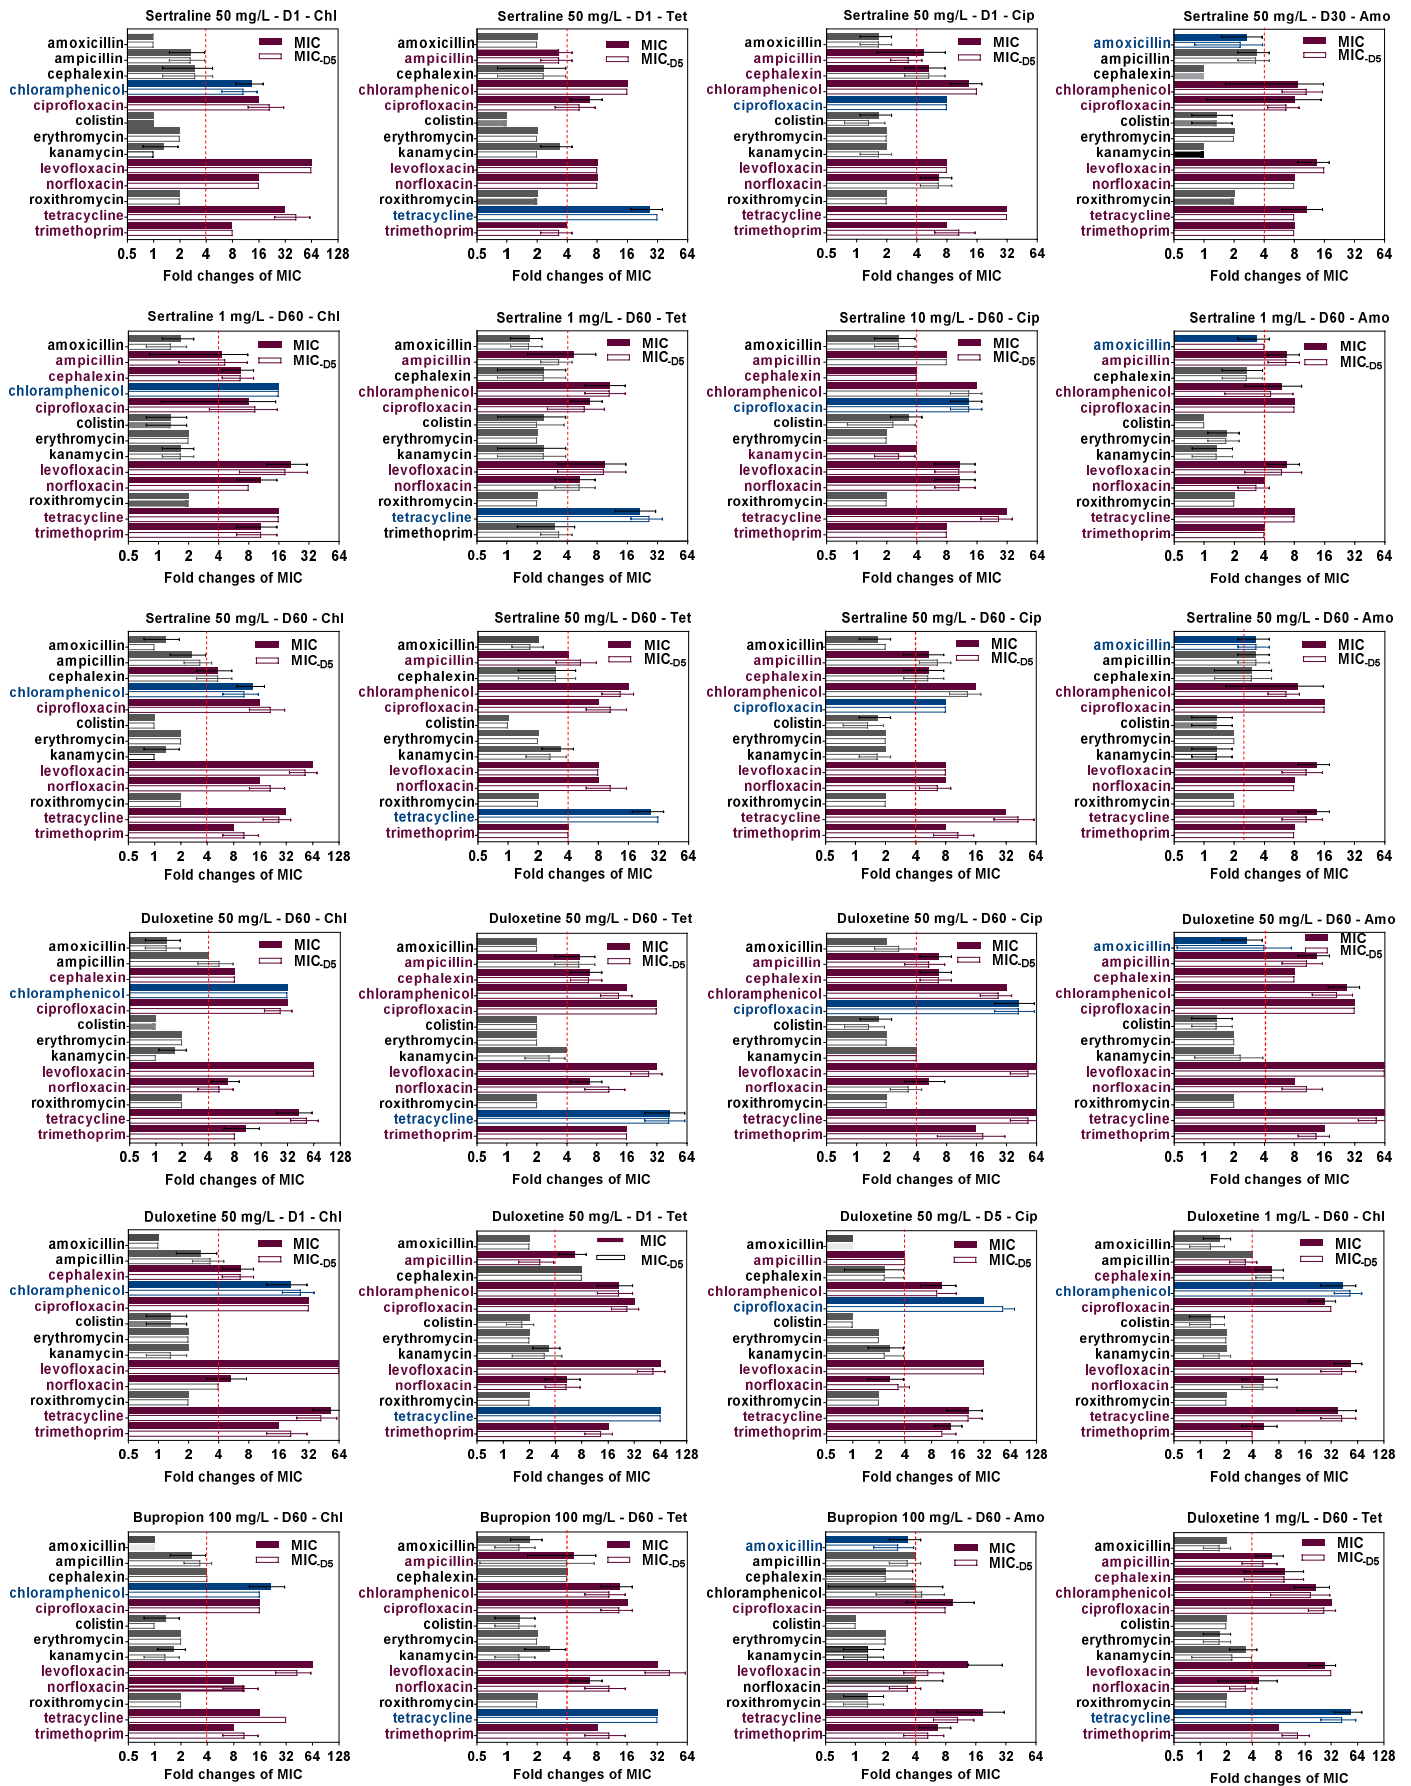

Figure S2. Fold changes of minimum inhibition concentrations (MIC) of randomly-picked mutant strains towards multiple antibiotics comparing with the wild-type control. MIC refers to the MIC of the mutant strains; MIC-D5 refers to the MIC of the same randomly-picked mutant strain after cultivating in LB broth for a consecutive 5 days. Data are shown as mean  $\pm$  SD, n=3 independent experiments.

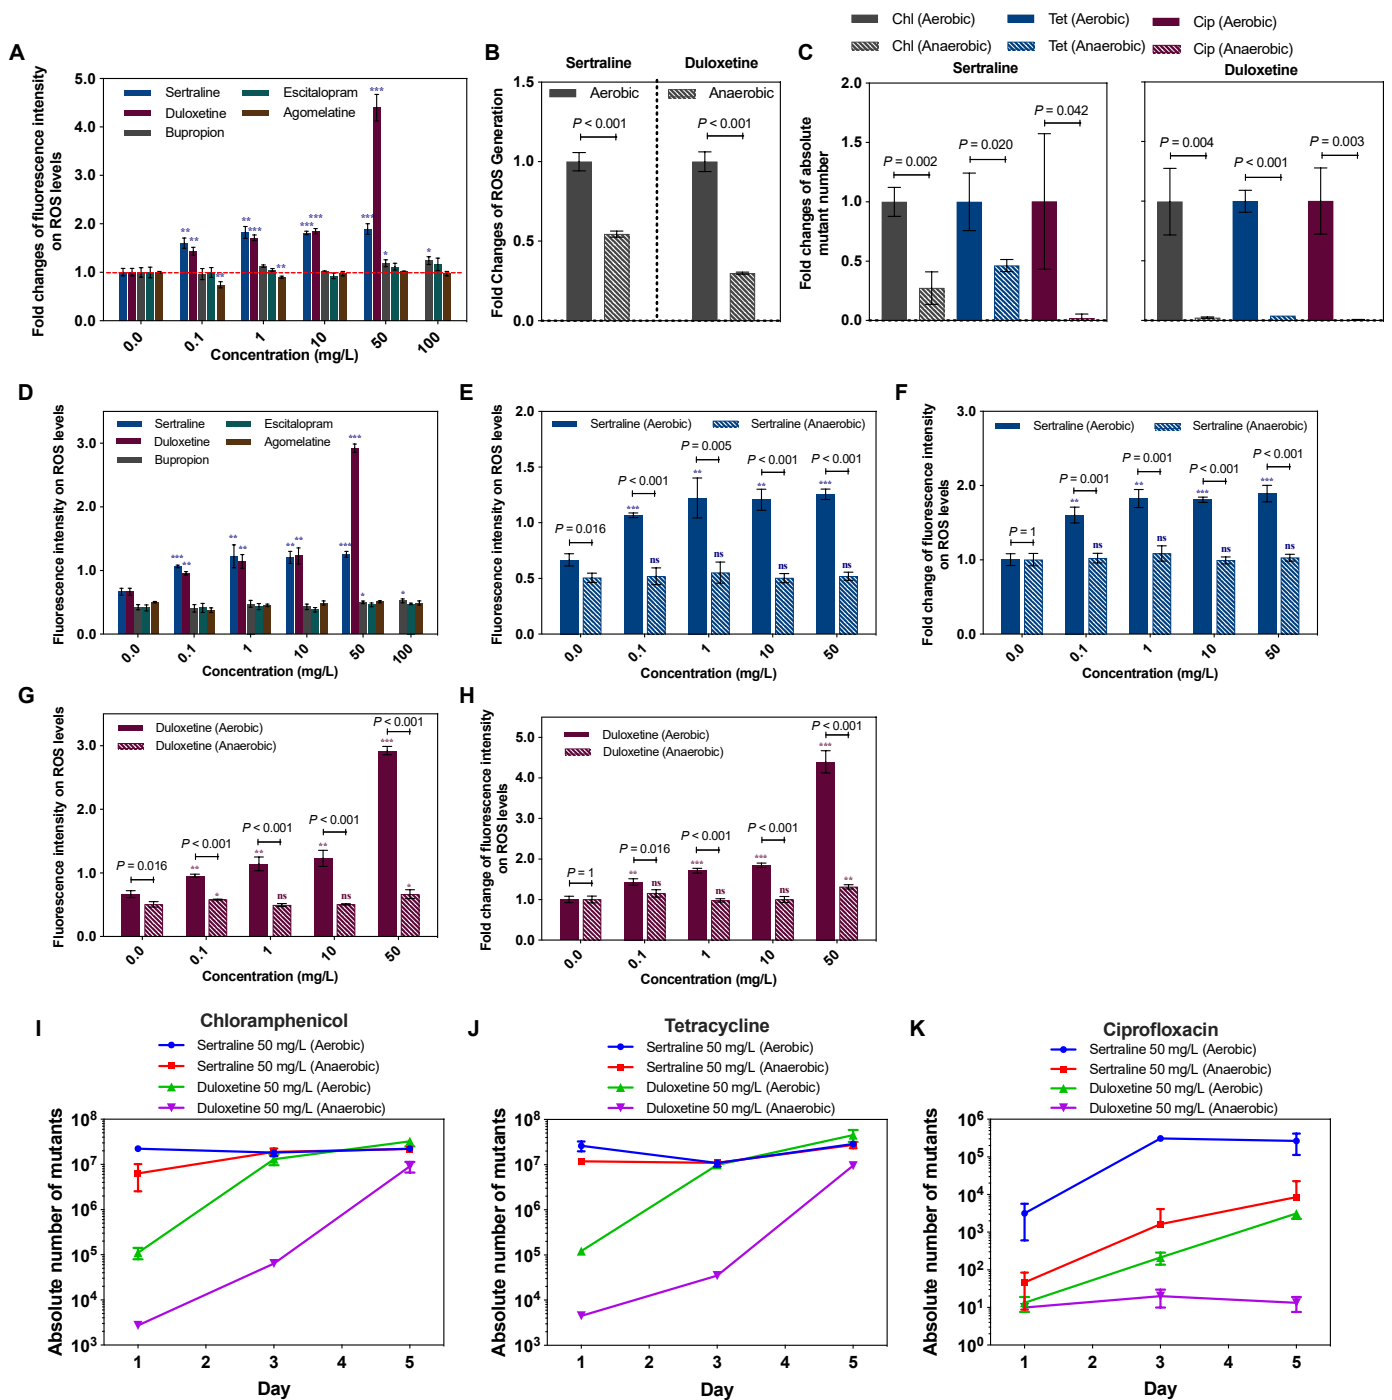

Figure S3. Antidepressants enhance ROS generation level, and thus induce multidrug resistance. (A) Fold changes of ROS generation under aerobic condition. (B) Fold changes of ROS generation under either aerobic or anaerobic conditions (with 50 mg/L sertraline and duloxetine). (C) Fold changes of absolute mutant number on chloramphenicol-, tetracycline-, ciprofloxacin- selective plates, under either aerobic or anaerobic conditions (with 50 mg/L sertraline and duloxetine). (D) ROS generation under the exposure of five antidepressants. (E) ROS generation caused by antidepressant sertraline under both aerobic and anaerobic conditions. (F) Fold changes of ROS generation caused by antidepressant sertraline under both aerobic and anaerobic conditions. (G) ROS generation caused by antidepressant duloxetine under both aerobic and anaerobic conditions. (H) Fold changes of ROS generation caused by antidepressant duloxetine under both aerobic and anaerobic conditions. (I) Absolute mutant numbers on chloramphenicol- selective plate, under the exposure of 50 mg/L sertraline or duloxetine aerobically/anaerobically. (J) Absolute mutant

numbers on tetracycline- selective plate, under the exposure of 50 mg/L sertraline or duloxetine aerobically/anaerobically. (K) Absolute mutant numbers on ciprofloxacin- selective plate, under the exposure of 50 mg/L sertraline or duloxetine aerobically/anaerobically. Data are shown as mean  $\pm$  SD, n=3 independent experiments. Significant differences between antidepressant-dosed samples and the non-antidepressant control are analyzed by independent-sample *t*-test with Benjamini–Hochberg multiple comparison testing, \*  $p < 0.05$ , \*\*  $p < 0.01$ , \*\*\*  $p < 0.001$ .

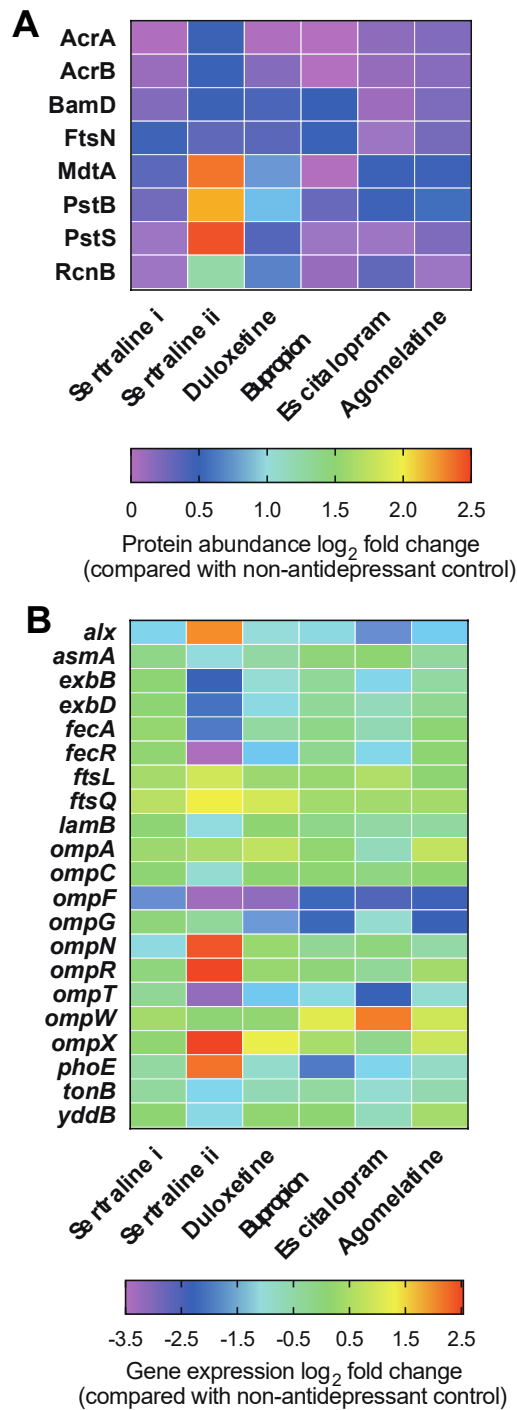

Figure S4. Antidepressants stimulate efflux pump and affect bacterial membrane. (A) Heatmap with  $\log_2$  fold changes of key proteins related to efflux pump, resistance-nodulation-division (RND) type efflux pumps, ATP-binding cassette (ABC) superfamily and multi antimicrobial extrusion protein family (MATE). (B) Heatmap with  $\log_2$  fold changes of key genes related to bacterial membrane. Sertraline i refers to 1 mg/L, and sertraline ii refers to 50 mg/L. The other four antidepressants are 50 mg/L.

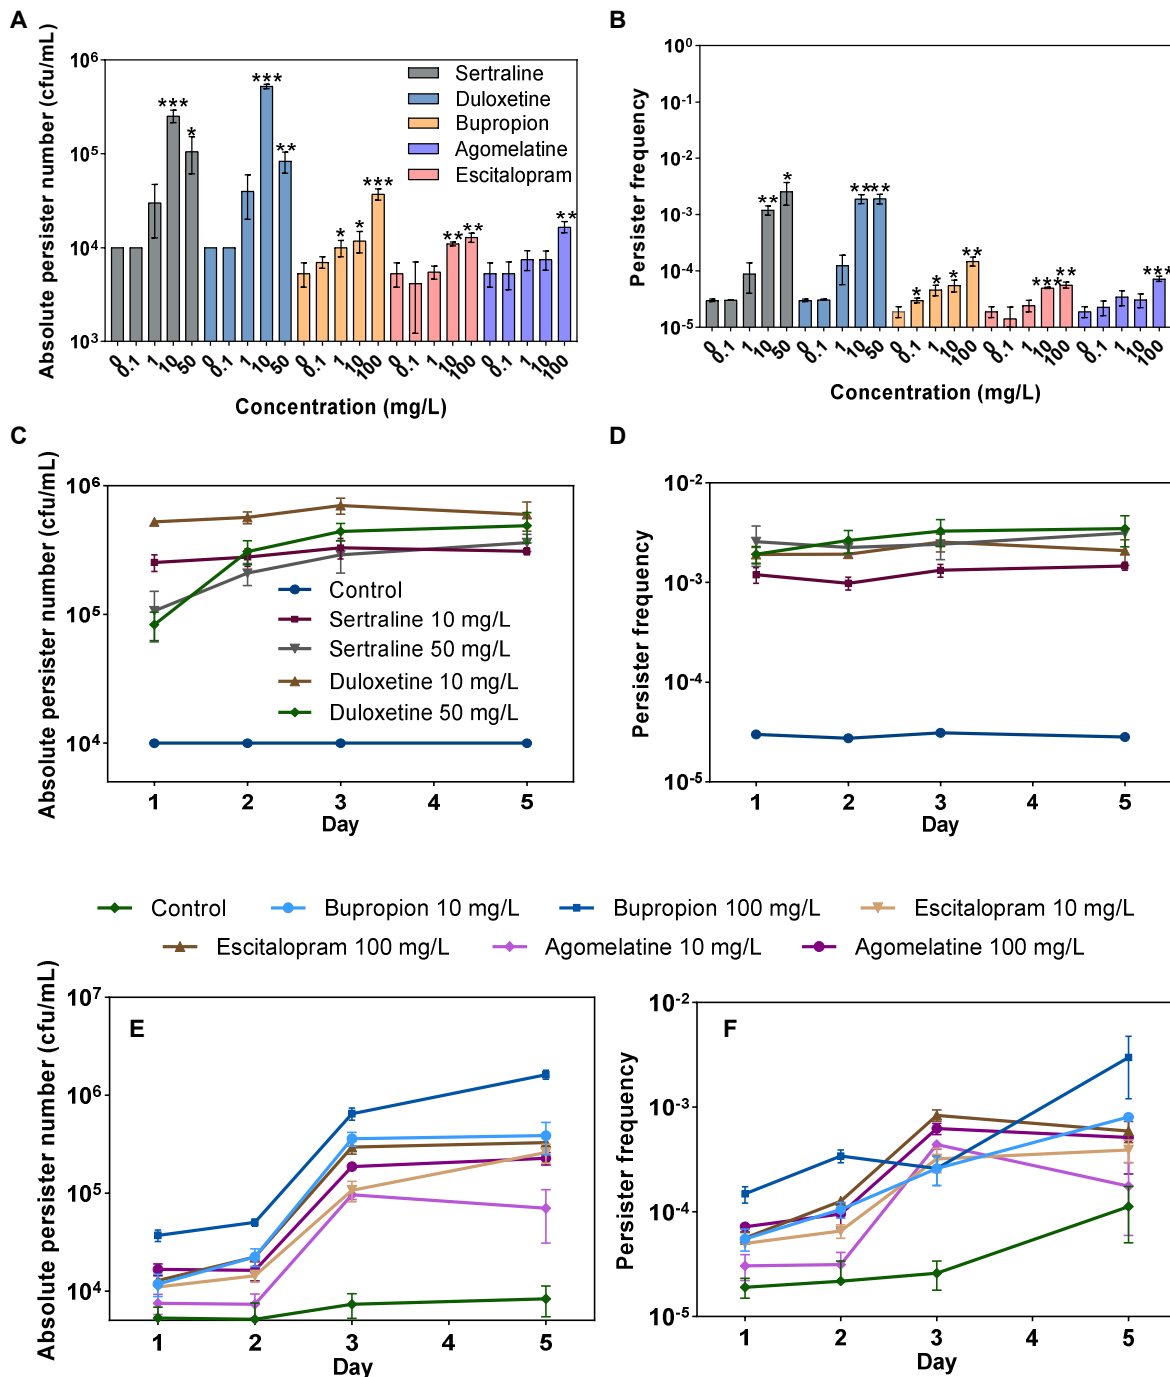

Figure S5. Antidepressants can enhance bacterial persistence towards antibiotic ciprofloxacin. (A) Absolute persister number when exposing wild-type *E. coli* to five antidepressants for 1 day. (B) Ratio of persister number to total cell number when exposing wild-type *E. coli* to five antidepressants for 1 day. (C) Absolute persister number when exposing wild-type *E. coli* to sertraline or duloxetine for a consecutive 5 days. (D) Ratio of persister number to total cell number when exposing wild-type *E. coli* to sertraline or duloxetine for a consecutive 5 days. (E) Absolute persister number when exposing wild-type *E. coli* to bupropion, escitalopram, or agomelatine for a consecutive 5 days. (F) Ratio of persister number to total cell number when exposing wild-type *E. coli* to bupropion, escitalopram, or agomelatine for a consecutive 5 days.



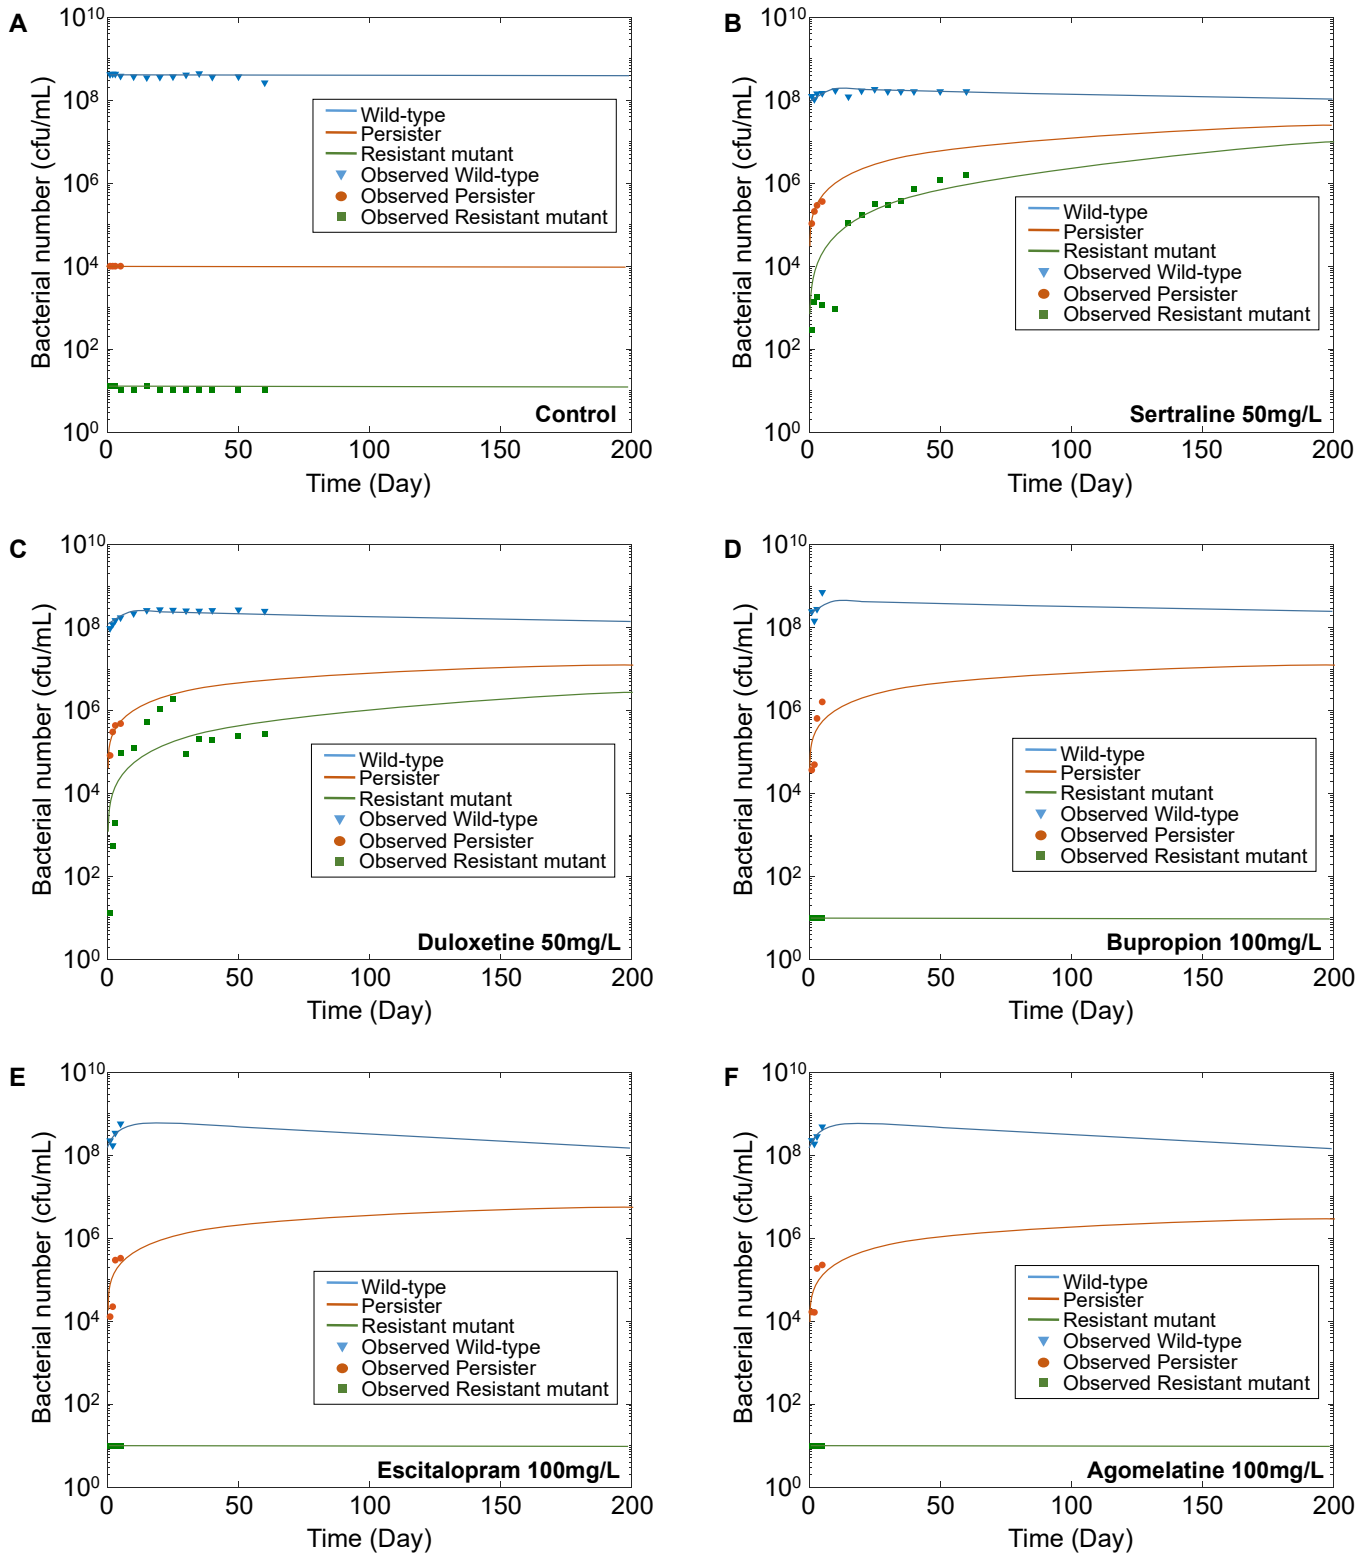

Figure S6. Antidepressants could affect the evolution of persister and resistant bacteria. (A)-(F), simulated trajectories of wild-type, persister, and antibiotic resistant mutant numbers under the non-antidepressant condition, 50 mg/L sertraline, 50 mg/L duloxetine, 100 mg/L bupropion, 100 mg/L escitalopram, and 100 mg/L agomelatine, respectively.

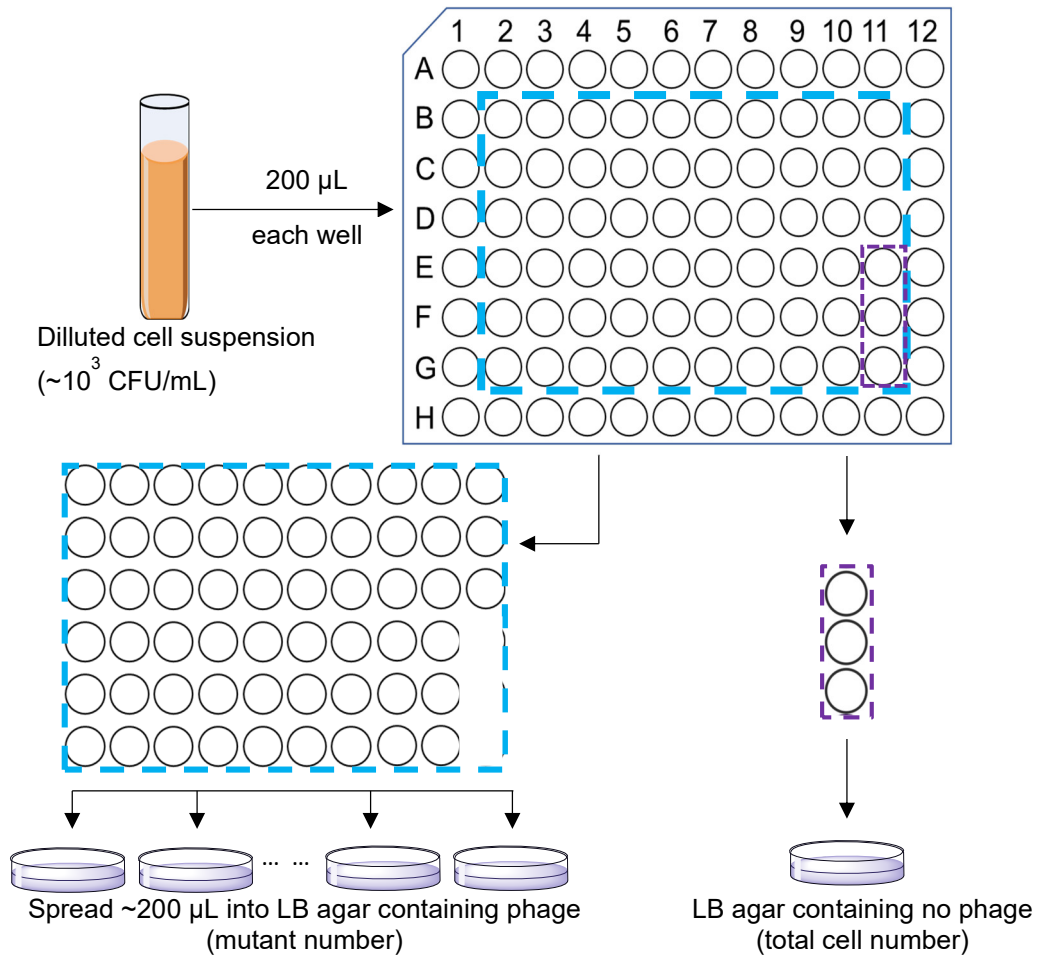

Figure S7. Diagram of fluctuation test

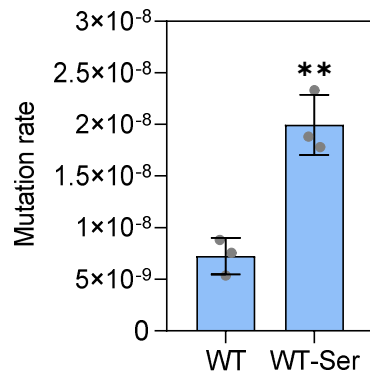

Figure S8. The calculated mutation rate of wild type *E. coli* MG1655 with (WT-Ser) or without (WT) 10 mg/L sertraline treatment. Each sample was run in three replicates. Significant difference between antidepressant-dosed samples and the non-antidepressant control is analyzed by independent-sample *t*-test with Benjamini–Hochberg multiple comparison testing, \*  $p < 0.05$ , \*\*  $p < 0.01$ . The zero class of Poisson distribution ( $P_0$ ) was verified by the range (0.3~2.3) of the expected number of mutations (1).

## Supplementary Tables

Table S1 Heredity test of minimum inhibition concentrations (MICs) towards multiple antibiotics when comparing the mutants with the wild-type control

| Mutant Strain               | MIC*              | Amoxicillin | Ampicillin | Cephalexin | Chloramphenicol | Ciprofloxacin | Colistin | Erythromycin | Kanamycin | Levofloxacin | Norfloxacn | Roxithromycin | Tetracycline | Trimethoprim |
|-----------------------------|-------------------|-------------|------------|------------|-----------------|---------------|----------|--------------|-----------|--------------|------------|---------------|--------------|--------------|
| Sertraline 50 mg/L -D1-Chl  | MIC               | 1±0         | 2.7±0.9    | 3.0±1.4    | 13.3±3.8        | 16±0          | 1±0      | 2±0          | 1.3±0.5   | 64±0         | 16±0       | 2±0           | 32±0         | 8±0          |
|                             | MIC <sub>DS</sub> | 1±0         | 2.7±0.9    | 3.0±1.4    | 10.7±3.8        | 21.3±7.5      | 1±0      | 2±0          | 1±0       | 64±0         | 16±0       | 2±0           | 42.7±15.1    | 8±0          |
| Sertraline 50 mg/L -D1-Tet  | MIC               | 2±0         | 3.3±0.9    | 2.3±1.2    | 16±0            | 6.7±1.9       | 1±0      | 2±0          | 3.3±0.9   | 8±0          | 8±0        | 2±0           | 26.7±7.5     | 4±0          |
|                             | MIC <sub>DS</sub> | 2±0         | 3.3±0.9    | 2.3±1.2    | 16±0            | 5.3±1.9       | 1±0      | 2±0          | 2±0       | 8±0          | 8±0        | 2±0           | 32±0         | 3.3±0.9      |
| Sertraline 50 mg/L -D1-Cip  | MIC               | 1.7±0.5     | 4.7±2.5    | 5.3±1.9    | 13.3±3.8        | 8±0           | 1.7±0.5  | 2±0          | 2±0       | 8±0          | 6.7±1.9    | 2±0           | 32±0         | 8±0          |
|                             | MIC <sub>DS</sub> | 1.7±0.5     | 3.3±0.9    | 5.3±1.9    | 16±0            | 9.3±5.0       | 1.3±0.5  | 2±0          | 1.7±0.5   | 18.7±10.0    | 8±0        | 2±0           | 16±0         | 10.7±3.8     |
| Sertraline 50 mg/L -D30-Amo | MIC               | 2.7±0.9     | 3.3±0.9    | 1±0        | 8.7±5.7         | 8.0±5.7       | 1.3±0.5  | 2±0          | 1±0       | 13.3±3.8     | 8±0        | 2±0           | 10.7±3.8     | 8±0          |
|                             | MIC <sub>DS</sub> | 3.3±0.9     | 3.3±0.9    | 1±0        | 10.7±3.8        | 6.7±1.9       | 1.3±0.5  | 2±0          | 1±0       | 16±0         | 8±0        | 2±0           | 8±0          | 8±0          |
| Sertraline 50 mg/L -D60-Chl | MIC               | 1.3±0.5     | 2.7±0.9    | 5.3±1.9    | 13.3±3.8        | 16±0          | 1±0      | 2±0          | 1.3±0.5   | 64±0         | 16±0       | 2±0           | 32±0         | 8±0          |
|                             | MIC <sub>DS</sub> | 1±0         | 3.3±0.9    | 5.3±1.9    | 10.7±3.8        | 21.3±7.5      | 1±0      | 2±0          | 1±0       | 53.3±15.1    | 21.3±7.5   | 2±0           | 32±0         | 10.7±3.8     |
| Sertraline 50 mg/L -D60-Tet | MIC               | 2±0         | 4±0        | 3.0±1.4    | 16±0            | 8±0           | 1±0      | 2±0          | 3.3±0.9   | 8±0          | 8±0        | 2±0           | 26.7±7.5     | 4±0          |
|                             | MIC <sub>DS</sub> | 1.7±0.5     | 5.3±1.9    | 3.0±1.4    | 13.3±3.8        | 10.7±3.8      | 1±0      | 2±0          | 2.7±0.9   | 8±0          | 10.7±3.8   | 2±0           | 32±0         | 4±0          |
| Sertraline 50 mg/L -D60-Cip | MIC               | 1.7±0.5     | 5.3±1.9    | 5.3±1.9    | 16±0            | 8±0           | 1.7±0.5  | 2±0          | 2±0       | 8±0          | 8±0        | 2±0           | 32±0         | 8±0          |
|                             | MIC <sub>DS</sub> | 2±0         | 6.7±1.9    | 5.3±1.9    | 13.3±3.8        | 8±0           | 1.3±0.5  | 2±0          | 1.7±0.5   | 8±0          | 6.7±1.9    | 2±0           | 42.7±15.1    | 10.7±3.8     |
| Sertraline 50 mg/L -D60-Amo | MIC               | 3.3±0.9     | 3.3±0.9    | 3.0±1.4    | 8.7±5.7         | 16±0          | 1.3±0.5  | 2±0          | 1.3±0.5   | 13.3±3.8     | 8±0        | 2±0           | 13.3±3.8     | 8±0          |
|                             | MIC <sub>DS</sub> | 3.3±0.9     | 3.3±0.9    | 3.0±1.4    | 6.7±1.9         | 16±0          | 1.3±0.5  | 2±0          | 1.3±0.5   | 10.7±3.8     | 8±0        | 2±0           | 10.7±3.8     | 8±0          |
| Sertraline 1 mg/L -D60-Chl  | MIC               | 1.7±0.5     | 4.3±2.9    | 6.7±1.9    | 16±0            | 8.0±5.7       | 1.3±0.5  | 2±0          | 1.7±0.5   | 21.3±7.5     | 10.7±3.8   | 2±0           | 16±0         | 10.7±3.8     |
|                             | MIC <sub>DS</sub> | 1.3±0.5     | 4.7±2.5    | 6.7±1.9    | 16±0            | 9.3±5.0       | 1.3±0.5  | 2±0          | 1.7±0.5   | 18.7±10.0    | 8±0        | 2±0           | 16±0         | 10.7±3.8     |
| Sertraline 1 mg/L -D60-Tet  | MIC               | 1.7±0.5     | 4.7±2.5    | 2.3±1.2    | 10.7±3.8        | 6.7±1.9       | 2.3±1.2  | 2±0          | 2.3±1.2   | 9.3±5.0      | 5.3±1.9    | 2±0           | 21.3±7.5     | 3.0±1.4      |
|                             | MIC <sub>DS</sub> | 1.7±0.5     | 3.3±0.9    | 2.3±1.2    | 10.7±3.8        | 6.0±2.8       | 2.0±1.4  | 2±0          | 2.3±1.2   | 9.3±5.0      | 5.3±1.9    | 2±0           | 26.7±7.5     | 3.3±0.9      |
| Sertraline 10 mg/L -D60-Cip | MIC               | 2.7±0.9     | 8±0        | 4±0        | 16±0            | 13.3±3.8      | 3.3±0.9  | 2±0          | 4±0       | 10.7±3.8     | 10.7±3.8   | 2±0           | 32±0         | 8±0          |
|                             | MIC <sub>DS</sub> | 2.7±0.9     | 8±0        | 4±0        | 13.3±3.8        | 13.3±3.8      | 2.3±1.2  | 2±0          | 2.7±0.9   | 10.7±3.8     | 10.7±3.8   | 2±0           | 26.7±7.5     | 8±0          |
| Sertraline 1 mg/L -D60-Amo  | MIC               | 3.3±0.9     | 6.7±1.9    | 2.7±0.9    | 6.0±2.8         | 8±0           | 1±0      | 1.7±0.5      | 1.3±0.5   | 6.7±1.9      | 4±0        | 2±0           | 8±0          | 4±0          |
|                             | MIC <sub>DS</sub> | 4±0         | 6.7±1.9    | 2.7±0.9    | 4.7±2.5         | 8±0           | 1±0      | 1.7±0.5      | 1.3±0.5   | 6.0±2.8      | 3.3±0.9    | 2±0           | 8±0          | 4±0          |
| Duloxetine 50 mg/L -D60-Chl | MIC               | 1.3±0.5     | 4±0        | 8±0        | 32±0            | 32±0          | 1±0      | 2±0          | 1.7±0.5   | 64±0         | 6.7±1.9    | 2±0           | 42.7±15.1    | 10.7±3.8     |
|                             | MIC <sub>DS</sub> | 1.3±0.5     | 5.3±1.9    | 8±0        | 32±0            | 26.7±7.5      | 1±0      | 2±0          | 1±0       | 64±0         | 5.3±1.9    | 2±0           | 53.3±15.1    | 8±0          |
| Duloxetine 50 mg/L -D60-Tet | MIC               | 2±0         | 5.3±1.9    | 6.7±1.9    | 16±0            | 32±0          | 2±0      | 2±0          | 4±0       | 32±0         | 6.7±1.9    | 2±0           | 42.7±15.1    | 16±0         |
|                             | MIC <sub>DS</sub> | 2±0         | 5.3±1.9    | 6.7±1.9    | 13.3±3.8        | 32±0          | 2±0      | 2±0          | 2.7±0.9   | 26.7±7.5     | 10.7±3.8   | 2±0           | 42.7±15.1    | 16±0         |
| Duloxetine 50 mg/L -D60-Cip | MIC               | 2±0         | 6.7±1.9    | 6.7±1.9    | 32±0            | 42.7±15.1     | 1.7±0.5  | 2±0          | 4±0       | 64±0         | 5.3±1.9    | 2±0           | 64±0         | 16±0         |
|                             | MIC <sub>DS</sub> | 2.7±0       | 5.3±1.9    | 6.7±1.9    | 26.7±7.5        | 42.7±15.1     | 1.3±0.5  | 2±0          | 4±0       | 53.3±15.1    | 3.3±0.9    | 2±0           | 53.3±15.1    | 13.3±3.8     |
| Duloxetine 50 mg/L -D60-Amo | MIC               | 2.7±0.9     | 13.3±3.8   | 8±0        | 26.7±7.5        | 32±0          | 1.3±0.5  | 2±0          | 2±0       | 64±0         | 8±0        | 2±0           | 64±0         | 16±0         |
|                             | MIC <sub>DS</sub> | 4.0±2.8     | 10.7±3.8   | 8±0        | 21.3±7.5        | 32±0          | 1.3±0.5  | 2±0          | 2.3±1.2   | 64±0         | 10.7±3.8   | 2±0           | 53.3±15.1    | 13.3±3.8     |
|                             | MIC               | 1±0         | 2.7±0.9    | 6.7±1.9    | 21.3±7.5        | 32±0          | 1.3±0.5  | 2±0          | 2±0       | 64±0         | 5.3±1.9    | 2±0           | 53.3±15.1    | 16±0         |

| Mutant Strain               | MIC*              | Amoxicillin | Ampicillin | Cephalexin | Chloramphenicol | Ciprofloxacin | Colistin | Erythromycin | Kanamycin | Levofloxacin | Norfloxacin | Roxithromycin | Tetracycline | Trimethoprim |
|-----------------------------|-------------------|-------------|------------|------------|-----------------|---------------|----------|--------------|-----------|--------------|-------------|---------------|--------------|--------------|
| Duloxetine 50 mg/L -D1-Chl  | MIC <sub>D5</sub> | 1±0         | 3.3±0.9    | 6.7±1.9    | 26.7±7.5        | 32±0          | 1.3±0.5  | 2±0          | 1.3±0.5   | 64±0         | 4±0         | 2±0           | 42.7±15.1    | 21.3±7.5     |
| Duloxetine 50 mg/L -D1-Tet  | MIC               | 2±0         | 6.7±1.9    | 8±0        | 21.3±7.5        | 32±0          | 2±0      | 2±0          | 3.3±0.9   | 64±0         | 5.3±1.9     | 2±0           | 64±0         | 16±0         |
|                             | MIC <sub>D5</sub> | 2±0         | 2.7±0.9    | 8±0        | 21.3±7.5        | 26.7±7.5      | 1.7±0.5  | 2±0          | 3.0±1.4   | 53.3±15.1    | 5.3±1.9     | 2±0           | 64±0         | 13.3±3.8     |
| Duloxetine 50 mg/L -D5-Cip  | MIC               | 1±0         | 4±0        | 2.3±1.2    | 10.7±3.8        | 32±0          | 1±0      | 2±0          | 2.7±0.9   | 32±0         | 2.7±0.9     | 2±0           | 21.3±7.5     | 13.3±3.8     |
|                             | MIC <sub>D5</sub> | 1±0         | 4±0        | 2.3±1.2    | 9.3±5.0         | 53.3±15.1     | 1±0      | 2±0          | 2.3±1.2   | 32±0         | 3.3±0.9     | 2±0           | 21.3±7.5     | 10.7±3.8     |
| Duloxetine 1 mg/L -D60-Chl  | MIC               | 1.7±0.5     | 4±0        | 6.7±1.9    | 42.7±15.1       | 26.7±7.5      | 1.3±0.5  | 2±0          | 2±0       | 53.3±15.1    | 5.3±1.9     | 2±0           | 37.3±20      | 5.3±1.9      |
|                             | MIC <sub>D5</sub> | 1.3±0.5     | 3.3±0.9    | 6.7±1.9    | 53.3±15.1       | 32±0          | 1.3±0.5  | 2±0          | 1.7±0.5   | 42.7±15.1    | 5.3±1.9     | 2±0           | 42.7±15.1    | 4±0          |
| Duloxetine 1 mg/L -D60-Tet  | MIC               | 2±0         | 6.7±1.9    | 9.3±5.0    | 21.3±7.5        | 32±0          | 2±0      | 1.7±0.5      | 3.3±0.9   | 26.7±7.5     | 4.7±2.5     | 2±0           | 53.3±15.1    | 10.7±3.8     |
|                             | MIC <sub>D5</sub> | 1.7±0.5     | 5.3±1.9    | 9.3±5.0    | 18.7±10.0       | 26.7±7.5      | 2±0      | 1.7±0.5      | 2.3±1.2   | 32±0         | 3.3±0.9     | 2±0           | 42.7±15.1    | 8±0          |
| Bupropion 100 mg/L -D60-Chl | MIC               | 1±0         | 2.7±0.9    | 4±0        | 21.3±7.5        | 16±0          | 1.3±0.5  | 2±0          | 1.7±0.5   | 64±0         | 8±0         | 2±0           | 16±0         | 8±0          |
|                             | MIC <sub>D5</sub> | 1±0         | 3.3±0.9    | 4±0        | 16±0            | 16±0          | 1±0      | 2±0          | 1.3±0.5   | 42.7±15.1    | 10.7±3.8    | 2±0           | 32±0         | 10.7±3.8     |
| Bupropion 100 mg/L -D60-Tet | MIC               | 1.7±0.5     | 4.7±2.5    | 4±0        | 13.3±3.8        | 16±0          | 1.3±0.5  | 2±0          | 2.7±0.9   | 32±0         | 6.7±1.9     | 2±0           | 32±0         | 8±0          |
|                             | MIC <sub>D5</sub> | 1.3±0.5     | 4.0±2.8    | 4±0        | 10.7±3.8        | 13.3±3.8      | 1.3±0.5  | 2±0          | 1.3±0.5   | 42.7±15.1    | 10.7±3.8    | 2±0           | 32±0         | 10.7±3.8     |
| Bupropion 100 mg/L -D60-Amo | MIC               | 3.3±0.9     | 4±0        | 2.0±1.4    | 4.0±2.8         | 9.3±5.0       | 1±0      | 2±0          | 1.3±0.5   | 13.3±13.2    | 4.0±2.8     | 1.3±0.5       | 18.7±10.0    | 6.7±1.9      |
|                             | MIC <sub>D5</sub> | 2.7±0.9     | 3.3±0.9    | 2.0±1.4    | 4.7±2.5         | 8±0           | 1±0      | 2±0          | 1.3±0.5   | 5.3±1.9      | 3.3±0.9     | 1.3±0.5       | 10.7±3.8     | 5.3±1.9      |

\* MIC refers to the MIC of the randomly picked mutant strains; MIC<sub>D5</sub> refers to the MIC of the same randomly-selected mutant strain after cultivating in LB broth for a consecutive 5 days. Data are shown as mean ± SD, n=3 independent experiments.

Table S2 Genes related to ROS production in *E. coli* MG1655 after exposure of antidepressants

| Gene        | COG Annotation                                                                                                                                    | Log <sub>2</sub> Fold Change of FPKM* |                       |                       |                      |                         |                        |
|-------------|---------------------------------------------------------------------------------------------------------------------------------------------------|---------------------------------------|-----------------------|-----------------------|----------------------|-------------------------|------------------------|
|             |                                                                                                                                                   | Sertraline 1<br>mg/L                  | Sertraline 50<br>mg/L | Duloxetine 50<br>mg/L | Bupropion 50<br>mg/L | Escitalopram<br>50 mg/L | Agomelatine<br>50 mg/L |
| <i>ahpF</i> | alkyl hydroperoxide reductase<br>FAD/NAD(P)-binding<br>oxidative demethylase of N1-<br>methyladenine or N3-methylcytosine                         | 0.78                                  | 1.02                  | 0.35                  | 0.88                 | 0.79                    | 0.76                   |
| <i>alkB</i> | DNA lesions                                                                                                                                       | 0.54                                  | 0.64                  | 0.42                  | 1.07                 | 1.01                    | 1.25                   |
| <i>dps</i>  | Fe-binding and storage protein<br>stress-inducible DNA-binding<br>protein                                                                         | 1.65                                  | 0.60                  | 1.42                  | 1.61                 | 0.81                    | 2.00                   |
| <i>glyS</i> | glycine tRNA synthetase beta<br>subunit                                                                                                           | -0.53                                 | 1.23                  | -0.06                 | -0.25                | 0.50                    | -0.17                  |
| <i>gor</i>  | glutathione oxidoreductase                                                                                                                        | -0.08                                 | 0.36                  | 0.47                  | 0.00                 | -0.08                   | 0.15                   |
| <i>hcp</i>  | hybrid-cluster [4Fe-2S-2O] subunit<br>of anaerobic terminal reductases                                                                            | 2.20                                  | 2.14                  | 1.92                  | 1.79                 | 0.41                    | 2.35                   |
| <i>hcr</i>  | HCP oxidoreductase NADH-<br>dependent                                                                                                             | 1.56                                  | 1.79                  | 2.00                  | 1.00                 | 0.79                    | 1.63                   |
| <i>iraD</i> | RpoS stabilizer after DNA damage<br>anti-RssB factor                                                                                              | 0.25                                  | 2.61                  | 1.16                  | 1.64                 | 0.59                    | 0.62                   |
| <i>iraP</i> | anti-RssB factor RpoS stabilizer<br>during Pi starvation anti-adaptor<br>protein                                                                  | -1.92                                 | -1.59                 | -2.76                 | -1.72                | -1.07                   | -2.20                  |
| <i>iscR</i> | isc operon transcriptional repressor<br>suf operon transcriptional activator<br>oxidative stress- and iron starvation-<br>inducible autorepressor | -0.44                                 | -0.71                 | -1.33                 | -0.21                | -0.11                   | -0.51                  |
| <i>katE</i> | catalase HPII heme d-containing                                                                                                                   | 0.27                                  | 6.10                  | 2.24                  | 0.17                 | 0.47                    | -0.52                  |
| <i>katG</i> | catalase-peroxidase HPI heme b-<br>containing                                                                                                     | 0.35                                  | 0.76                  | 1.59                  | 0.31                 | 0.57                    | 0.07                   |
| <i>lysR</i> | transcriptional activator of lysA<br>autorepressor                                                                                                | -0.11                                 | -0.85                 | -0.22                 | 0.60                 | -0.05                   | 1.19                   |
| <i>oxyR</i> | oxidative and nitro sative stress<br>transcriptional regulator                                                                                    | 0.47                                  | 0.49                  | 0.21                  | -0.40                | -0.48                   | -0.44                  |
| <i>rutA</i> | pyrimidine oxygenase FMN-<br>dependent                                                                                                            | 0.68                                  | 2.57                  | 1.59                  | 0.55                 | 0.77                    | 1.02                   |

| Gene        | COG Annotation                                                                                   | Log <sub>2</sub> Fold Change of FPKM * |                       |                       |                      |                         |                        |
|-------------|--------------------------------------------------------------------------------------------------|----------------------------------------|-----------------------|-----------------------|----------------------|-------------------------|------------------------|
|             |                                                                                                  | Sertraline 1<br>mg/L                   | Sertraline 50<br>mg/L | Duloxetine 50<br>mg/L | Bupropion 50<br>mg/L | Escitalopram<br>50 mg/L | Agomelatine<br>50 mg/L |
| <i>rutD</i> | putative reactive intermediate<br>detoxifying amino acrylate hydrolase                           | 1.81                                   | 0.93                  | 0.86                  | 2.21                 | -0.01                   | 2.40                   |
| <i>sodB</i> | superoxide dismutase%2C Fe                                                                       | 0.53                                   | 1.33                  | 0.83                  | 0.31                 | 0.28                    | 0.77                   |
| <i>sodC</i> | superoxide dismutase%2C Cu Zn<br>periplasmic                                                     | 0.00                                   | 2.58                  | 0.91                  | 0.73                 | 0.95                    | 0.97                   |
| <i>soxR</i> | redox-sensitive transcriptional<br>activator of soxS autorepressor                               | 0.84                                   | 0.54                  | 1.21                  | 1.33                 | 1.34                    | 1.54                   |
| <i>soxS</i> | superoxide response regulon<br>transcriptional activator<br>autoregulator                        | -2.28                                  | 2.87                  | -0.02                 | -0.90                | -0.79                   | -2.23                  |
| <i>sufA</i> | Fe-S cluster assembly protein                                                                    | 2.71                                   | 1.88                  | 2.61                  | 2.25                 | 2.03                    | 2.44                   |
| <i>ydeI</i> | hydrogen peroxide resistance OB<br>fold protein putative periplasmic<br>protein                  | 0.14                                   | 2.72                  | 0.21                  | 0.04                 | 0.39                    | -0.99                  |
| <i>ydeJ</i> | inactive PncC family protein                                                                     | 0.01                                   | 3.20                  | 0.59                  | -0.39                | 0.22                    | -0.12                  |
| <i>ydeO</i> | UV-inducible global regulator EvgA-<br>GadE-dependent                                            | 0.17                                   | 3.02                  | 1.34                  | -0.26                | -0.29                   | 0.06                   |
| <i>yggE</i> | oxidative stress defense protein                                                                 | 0.44                                   | 0.86                  | 0.84                  | 0.28                 | -1.10                   | -0.83                  |
| <i>yhhZ</i> | putative Hcp1 family polymorphic<br>toxin protein putative colicin-like<br>DNase/tRNase activity | 0.33                                   | 3.04                  | 1.02                  | 0.62                 | 0.01                    | -0.86                  |

\*: Comparing with the non-antidepressant control group

Table S3 Proteins related to ROS production in *E. coli* MG1655 after exposure of antidepressants

| Protein | Description                       | Log <sub>2</sub> Fold Change of Protein Abundance* |                       |                       |                      |                         |                        |
|---------|-----------------------------------|----------------------------------------------------|-----------------------|-----------------------|----------------------|-------------------------|------------------------|
|         |                                   | Sertraline 1<br>mg/L                               | Sertraline 50<br>mg/L | Duloxetine 50<br>mg/L | Bupropion 50<br>mg/L | Escitalopram<br>50 mg/L | Agomelatine<br>50 mg/L |
|         | Alkyl hydroperoxide reductase     |                                                    |                       |                       |                      |                         |                        |
| AhpF    | subunit F                         | -0.08                                              | 0.21                  | 0.04                  | -0.08                | 0.02                    | 0.03                   |
| Gor     | Glutathione reductase             | -0.04                                              | 0.27                  | 0.16                  | -0.02                | 0.13                    | 0.16                   |
| Hcp     | Hydroxylamine reductase           | 0.43                                               | 0.77                  | 0.68                  | 0.12                 | 0.50                    | 0.47                   |
| Hcr     | NADH oxidoreductase               | 0.95                                               | 1.23                  | 0.05                  | 0.55                 | -0.01                   | 0.02                   |
| KatE    | Catalase HPII                     | 0.98                                               | 2.90                  | 1.05                  | 0.34                 | 1.15                    | 0.39                   |
| LysC    | Lysine-sensitive kinase           | 0.14                                               | 1.30                  | 0.76                  | 0.34                 | 0.57                    | 0.10                   |
| LysS    | Lysine--tRNA ligase               | 0.09                                               | 0.08                  | 0.07                  | 0.16                 | 0.09                    | 0.13                   |
|         | Hydrogen peroxide-inducible genes |                                                    |                       |                       |                      |                         |                        |
| OxyR    | activator                         | 0.36                                               | 0.69                  | 0.31                  | 0.22                 | 0.49                    | 0.06                   |
| SodA    | Superoxide dismutase [Mn]         | 0.17                                               | 0.70                  | 0.68                  | 0.23                 | -0.17                   | 0.13                   |
| SodB    | Superoxide dismutase [Fe]         | 0.04                                               | 0.42                  | 0.22                  | 0.09                 | -0.09                   | -0.07                  |
| YajD    | Putative HNH nuclease             | 3.05                                               | 1.43                  | 3.97                  | 3.00                 | 1.11                    | 0.40                   |
| YggE    | Oxidative stress defense protein  | 0.09                                               | 0.89                  | 0.57                  | 0.17                 | 0.58                    | 0.10                   |

\*: Comparing with the non-antidepressant control group



Table S4 Genes related to ROS production in antidepressant sertraline- induced (60 days) mutants, after the exposure of 50 mg/L sertraline

| Gene        | COG Annotation                                                                                          | Log <sub>2</sub> Fold Change of FPKM *   |                                       |                                        |                                      |                                           |                                        |                                         |                                       |
|-------------|---------------------------------------------------------------------------------------------------------|------------------------------------------|---------------------------------------|----------------------------------------|--------------------------------------|-------------------------------------------|----------------------------------------|-----------------------------------------|---------------------------------------|
|             |                                                                                                         | Sertraline 1<br>mg/L-<br>chloramphenicol | Sertraline<br>1 mg/L-<br>tetracycline | Sertraline 1<br>mg/L-<br>ciprofloxacin | Sertraline<br>1 mg/L-<br>amoxicillin | Sertraline 50<br>mg/L-<br>chloramphenicol | Sertraline<br>50 mg/L-<br>tetracycline | Sertraline 50<br>mg/L-<br>ciprofloxacin | Sertraline<br>50 mg/L-<br>amoxicillin |
| <i>ahpF</i> | alkyl hydroperoxide<br>reductase FAD/NAD(P)-<br>binding                                                 | 1.47                                     | 1.31                                  | 1.43                                   | 0.83                                 | 1.08                                      | 0.71                                   | 1.16                                    | 1.18                                  |
| <i>alkB</i> | oxidative demethylase of<br>N1-methyladenine or N3-<br>methylcytosine DNA lesions                       | -0.58                                    | 0.21                                  | 0.45                                   | -0.82                                | -0.44                                     | 0.10                                   | -0.98                                   | -0.46                                 |
| <i>dps</i>  | Fe-binding and storage<br>protein stress-inducible<br>DNA-binding protein                               | 0.42                                     | 1.55                                  | 1.28                                   | 0.86                                 | 0.36                                      | 0.94                                   | 1.10                                    | 0.39                                  |
| <i>glyS</i> | glycine tRNA synthetase<br>beta subunit                                                                 | 1.39                                     | 1.47                                  | 1.03                                   | 1.02                                 | 1.33                                      | 0.73                                   | 1.04                                    | 1.52                                  |
| <i>gor</i>  | glutathione oxidoreductase<br>hybrid-cluster [4Fe-2S-2O]                                                | 0.57                                     | 0.70                                  | 0.68                                   | 1.32                                 | 0.50                                      | 0.61                                   | 0.71                                    | 0.39                                  |
| <i>hcp</i>  | subunit of anaerobic<br>terminal reductases<br>HCP oxidoreductase                                       | -0.37                                    | 2.23                                  | 1.00                                   | 0.33                                 | 0.42                                      | 0.76                                   | 1.33                                    | 0.63                                  |
| <i>hcr</i>  | NADH-dependent<br>RpoS stabilizer after DNA<br>damage anti-RssB factor                                  | 0.94                                     | 1.96                                  | 1.50                                   | 1.11                                 | 1.18                                      | 1.40                                   | 1.63                                    | 0.82                                  |
| <i>iraD</i> | anti-RssB factor RpoS<br>stabilizer during Pi starvation                                                | 2.05                                     | 2.35                                  | 2.07                                   | 2.46                                 | 1.81                                      | 0.36                                   | 1.87                                    | 0.84                                  |
| <i>iraP</i> | anti-adapter protein<br>isc operon transcriptional<br>repressor suf operon<br>transcriptional activator | -3.57                                    | -2.06                                 | -2.99                                  | -1.60                                | -1.83                                     | -2.02                                  | -1.77                                   | -2.17                                 |
| <i>iscR</i> | oxidative stress- and iron<br>starvation-inducible<br>autorepressor                                     | 0.08                                     | -0.08                                 | -0.05                                  | 0.57                                 | 0.69                                      | -0.40                                  | -0.04                                   | 0.22                                  |
| <i>katE</i> | catalase HPII heme d-<br>containing                                                                     | 4.40                                     | 4.02                                  | 2.01                                   | 2.95                                 | 0.86                                      | 1.32                                   | 2.07                                    | 1.31                                  |
| <i>katG</i> | catalase-peroxidase HPI<br>heme b-containing                                                            | 1.21                                     | 1.14                                  | 1.07                                   | 2.03                                 | 1.57                                      | 1.25                                   | 1.97                                    | 1.12                                  |

| Gene        | COG Annotation                                                                  | Log <sub>2</sub> Fold Change of FPKM *   |                                       |                                        |                                      |                                           |                                        |                                         |                                       |
|-------------|---------------------------------------------------------------------------------|------------------------------------------|---------------------------------------|----------------------------------------|--------------------------------------|-------------------------------------------|----------------------------------------|-----------------------------------------|---------------------------------------|
|             |                                                                                 | Sertraline 1<br>mg/L-<br>chloramphenicol | Sertraline<br>1 mg/L-<br>tetracycline | Sertraline 1<br>mg/L-<br>ciprofloxacin | Sertraline<br>1 mg/L-<br>amoxicillin | Sertraline 50<br>mg/L-<br>chloramphenicol | Sertraline<br>50 mg/L-<br>tetracycline | Sertraline 50<br>mg/L-<br>ciprofloxacin | Sertraline<br>50 mg/L-<br>amoxicillin |
| <i>lysR</i> | transcriptional activator of<br>lysA autorepressor                              | -0.76                                    | -0.51                                 | 0.01                                   | -0.82                                | -0.44                                     | 0.19                                   | -0.59                                   | -0.68                                 |
| <i>oxyR</i> | oxidative and nitro sative<br>stress transcriptional<br>regulator               | 0.49                                     | 0.84                                  | 0.91                                   | 1.12                                 | 0.57                                      | 0.80                                   | -0.21                                   | 0.46                                  |
| <i>rutA</i> | pyrimidine oxygenase FMN-<br>dependent                                          | 1.69                                     | 1.89                                  | 1.47                                   | 2.15                                 | 0.70                                      | 0.98                                   | 1.80                                    | 0.38                                  |
| <i>rutD</i> | putative reactive<br>intermediate detoxifying<br>amino acrylate hydrolase       | 1.37                                     | 0.51                                  | 0.19                                   | 2.34                                 | 1.41                                      | 0.99                                   | 1.83                                    | 0.32                                  |
| <i>sodB</i> | superoxide dismutase%2C<br>Fe                                                   | 0.79                                     | 0.68                                  | 0.64                                   | 0.57                                 | 0.88                                      | 0.41                                   | 0.46                                    | 0.52                                  |
| <i>sodC</i> | superoxide dismutase%2C<br>Cu Zn periplasmic<br>redox-sensitive                 | 2.00                                     | 1.94                                  | 1.10                                   | 2.01                                 | 0.03                                      | 1.25                                   | 0.85                                    | 0.42                                  |
| <i>soxR</i> | transcriptional activator of<br>soxS autorepressor                              | -1.33                                    | -1.62                                 | 0.40                                   | 0.49                                 | 0.06                                      | 0.65                                   | 0.12                                    | -0.34                                 |
| <i>soxS</i> | superoxide response regulon<br>transcriptional activator<br>autoregulator       | 0.05                                     | 0.42                                  | 1.20                                   | 2.35                                 | 1.02                                      | 0.55                                   | 1.04                                    | 0.71                                  |
| <i>sufA</i> | Fe-S cluster assembly<br>protein                                                | -0.27                                    | 0.34                                  | -0.58                                  | -0.03                                | -0.81                                     | -0.91                                  | 0.38                                    | -1.41                                 |
| <i>ydeI</i> | hydrogen peroxide<br>resistance OB fold protein<br>putative periplasmic protein | 2.40                                     | 2.23                                  | 0.68                                   | 2.40                                 | -0.11                                     | 0.70                                   | 1.32                                    | 0.56                                  |
| <i>ydeJ</i> | inactive PncC family protein                                                    | 2.68                                     | 1.44                                  | 0.93                                   | 3.57                                 | 0.78                                      | 1.24                                   | 1.07                                    | 0.43                                  |
| <i>ydeO</i> | UV-inducible global<br>regulator EvgA- GadE-<br>dependent                       | 0.90                                     | -1.41                                 | -1.42                                  | 0.95                                 | -0.88                                     | 0.55                                   | 0.18                                    | -1.02                                 |
| <i>yggE</i> | oxidative stress defense<br>protein                                             | 1.21                                     | 1.36                                  | 0.47                                   | 1.42                                 | 0.22                                      | 0.33                                   | 0.54                                    | -0.18                                 |
| <i>yhhZ</i> | putative Hcp1 family<br>polymorphic toxin protein                               | 0.33                                     | 0.67                                  | 0.89                                   | 2.35                                 | 0.64                                      | 0.62                                   | -0.36                                   | -0.17                                 |

| Gene | COG Annotation                                 | Log <sub>2</sub> Fold Change of FPKM *   |                                       |                                        |                                      |                                           |                                        |                                         |                                       |
|------|------------------------------------------------|------------------------------------------|---------------------------------------|----------------------------------------|--------------------------------------|-------------------------------------------|----------------------------------------|-----------------------------------------|---------------------------------------|
|      |                                                | Sertraline 1<br>mg/L-<br>chloramphenicol | Sertraline<br>1 mg/L-<br>tetracycline | Sertraline 1<br>mg/L-<br>ciprofloxacin | Sertraline<br>1 mg/L-<br>amoxicillin | Sertraline 50<br>mg/L-<br>chloramphenicol | Sertraline<br>50 mg/L-<br>tetracycline | Sertraline 50<br>mg/L-<br>ciprofloxacin | Sertraline<br>50 mg/L-<br>amoxicillin |
|      | putative colicin-like<br>DNase/tRNase activity |                                          |                                       |                                        |                                      |                                           |                                        |                                         |                                       |

\*: Comparing with the mutant control group without any sertraline dosage

Table S5 Proteins related to ROS production in antidepressant sertraline- induced (60 days) mutants, after the exposure of 50 mg/L sertraline

| Protein | Description                                                             | Log <sub>2</sub> Fold Change of FPKM *   |                                       |                                        |                                      |                                           |                                        |                                         |                                       |
|---------|-------------------------------------------------------------------------|------------------------------------------|---------------------------------------|----------------------------------------|--------------------------------------|-------------------------------------------|----------------------------------------|-----------------------------------------|---------------------------------------|
|         |                                                                         | Sertraline 1<br>mg/L-<br>chloramphenicol | Sertraline<br>1 mg/L-<br>tetracycline | Sertraline 1<br>mg/L-<br>ciprofloxacin | Sertraline<br>1 mg/L-<br>amoxicillin | Sertraline 50<br>mg/L-<br>chloramphenicol | Sertraline<br>50 mg/L-<br>tetracycline | Sertraline 50<br>mg/L-<br>ciprofloxacin | Sertraline<br>50 mg/L-<br>amoxicillin |
| AhpF    | Alkyl hydroperoxide<br>reductase subunit F                              | 0.24                                     | -0.12                                 | 0.12                                   | 0.42                                 | -0.37                                     | -0.20                                  | -0.38                                   | 0.15                                  |
| Gor     | Glutathione reductase                                                   | -0.01                                    | -0.25                                 | 0.04                                   | 0.35                                 | -0.23                                     | -0.31                                  | -0.89                                   | 0.25                                  |
| Hcp     | Hydroxylamine reductase                                                 | -1.49                                    | -0.09                                 | 1.25                                   | -1.65                                | 0.19                                      | 0.97                                   | 0.52                                    | -1.43                                 |
| Hcr     | NADH oxidoreductase                                                     | 0.06                                     | -0.01                                 | 0.45                                   | -0.85                                | 0.43                                      | 0.99                                   | 1.76                                    | -0.60                                 |
| KatE    | Catalase HPII                                                           | 1.18                                     | 1.43                                  | -0.15                                  | 1.41                                 | -0.31                                     | 0.10                                   | -0.70                                   | 0.77                                  |
| LysC    | Lysine-sensitive kinase                                                 | 3.18                                     | 0.73                                  | 0.50                                   | 3.83                                 | 0.46                                      | 2.99                                   | 0.84                                    | 3.32                                  |
| LysS    | Lysine--tRNA ligase                                                     | 0.38                                     | 0.08                                  | -0.06                                  | 0.69                                 | 0.02                                      | 0.09                                   | -0.33                                   | 0.12                                  |
| OxyR    | Hydrogen peroxide-<br>inducible genes activator<br>Superoxide dismutase | 0.17                                     | -0.44                                 | 0.00                                   | 0.44                                 | -0.58                                     | -0.23                                  | -1.49                                   | 0.03                                  |
| SodA    | [Mn]                                                                    | 0.58                                     | 0.91                                  | -0.13                                  | -0.93                                | -0.68                                     | -0.78                                  | -1.71                                   | -1.22                                 |
| SodB    | Superoxide dismutase [Fe]                                               | -0.04                                    | 0.21                                  | -0.13                                  | -0.15                                | 0.00                                      | 0.00                                   | 0.03                                    | 0.78                                  |
| YajD    | Putative HNH nuclease                                                   | -0.23                                    | 0.52                                  | 0.30                                   | 0.53                                 | -0.25                                     | 0.31                                   | -0.64                                   | 1.52                                  |
| YggE    | Oxidative stress defense<br>protein                                     | 1.40                                     | 0.73                                  | 0.73                                   | 1.55                                 | 0.20                                      | 1.21                                   | 0.10                                    | 1.31                                  |

\*: Comparing with the mutant control group without any sertraline dosage

Table S6 Genes related to efflux pump in *E. coli* MG1655 after exposure of antidepressants

| Gene        | COG Annotation                                                                                                                           | Log <sub>2</sub> Fold Change of FPKM* |                       |                       |                      |                         |                        |
|-------------|------------------------------------------------------------------------------------------------------------------------------------------|---------------------------------------|-----------------------|-----------------------|----------------------|-------------------------|------------------------|
|             |                                                                                                                                          | Sertraline 1<br>mg/L                  | Sertraline 50<br>mg/L | Duloxetine 50<br>mg/L | Bupropion 50<br>mg/L | Escitalopram<br>50 mg/L | Agomelatine<br>50 mg/L |
| <i>acrA</i> | multidrug efflux system                                                                                                                  | 0.29                                  | 2.20                  | 0.10                  | -0.70                | -0.64                   | -0.89                  |
| <i>acrB</i> | multidrug efflux system protein                                                                                                          | 0.03                                  | 2.66                  | 0.48                  | -0.10                | 0.17                    | -0.09                  |
| <i>acrD</i> | aminoglycoside/multidrug efflux system                                                                                                   | 0.62                                  | 2.50                  | 0.80                  | -0.77                | -0.68                   | -0.68                  |
| <i>acrR</i> | transcriptional repressor                                                                                                                | -1.08                                 | -0.22                 | -1.23                 | -0.98                | -2.08                   | -1.72                  |
| <i>bamA</i> | BamABCDE complex OM biogenesis outer<br>membrane pore-forming assembly factor<br>copper/silver efflux system outer membrane<br>component | -0.12                                 | 1.12                  | 0.05                  | 0.02                 | 0.37                    | -0.14                  |
| <i>cusC</i> | component                                                                                                                                | 1.35                                  | -1.39                 | 0.70                  | 0.87                 | 1.21                    | 1.08                   |
| <i>emrA</i> | multidrug efflux system                                                                                                                  | 0.10                                  | 0.88                  | -1.20                 | -0.13                | -0.96                   | -0.25                  |
| <i>emrB</i> | multidrug efflux system protein                                                                                                          | 0.18                                  | 1.45                  | 0.91                  | -0.45                | -0.73                   | -0.18                  |
| <i>ftsX</i> | putative ABC transporter permease                                                                                                        | 0.37                                  | 0.88                  | 0.04                  | 0.14                 | -0.08                   | 0.54                   |
| <i>iceT</i> | putative citrate/iron-citrate/zinc-citrate<br>efflux transporter                                                                         | 0.33                                  | 4.06                  | 1.22                  | -0.15                | 0.53                    | 0.57                   |
| <i>macB</i> | macrolide ABC transporter<br>peremase/ATPase                                                                                             | 1.06                                  | 0.51                  | 1.14                  | 0.63                 | -0.25                   | 1.48                   |
| <i>marA</i> | multiple antibiotic resistance transcriptional<br>regulator                                                                              | -0.07                                 | 4.37                  | 0.72                  | -0.97                | -1.55                   | 0.17                   |
| <i>mdtA</i> | multidrug efflux system subunit A                                                                                                        | 0.37                                  | 5.65                  | 0.98                  | -0.16                | 0.42                    | -0.45                  |
| <i>mdtB</i> | multidrug efflux system subunit B                                                                                                        | -0.20                                 | 4.86                  | 0.50                  | 0.19                 | 0.21                    | -0.33                  |
| <i>mdtC</i> | multidrug efflux system subunit C                                                                                                        | 0.40                                  | 4.68                  | 0.62                  | 0.02                 | 0.64                    | -0.13                  |
| <i>mdtE</i> | anaerobic multidrug efflux transporter<br>ArcA-regulated                                                                                 | 2.00                                  | -3.25                 | -0.75                 | 1.12                 | 0.02                    | 1.20                   |
| <i>mdtF</i> | anaerobic multidrug efflux transporter<br>ArcA-regulated                                                                                 | 1.92                                  | -2.51                 | -0.36                 | 1.59                 | 0.69                    | 1.28                   |
| <i>mdtM</i> | multidrug efflux system protein                                                                                                          | 1.71                                  | 2.31                  | 1.26                  | 1.89                 | 0.20                    | 2.05                   |
| <i>mlaA</i> | ABC transporter maintaining OM lipid<br>asymmetry OM lipoprotein component                                                               | -0.47                                 | 1.38                  | -0.61                 | -0.68                | -0.49                   | -0.29                  |
| <i>mlaB</i> | ABC transporter maintaining OM lipid<br>asymmetry cytoplasmic STAS component                                                             | -1.63                                 | 3.56                  | 0.51                  | -0.92                | -1.73                   | -1.52                  |
| <i>mlaC</i> | ABC transporter maintaining OM lipid<br>asymmetry periplasmic binding protein                                                            | -0.43                                 | 2.41                  | 0.48                  | -0.69                | -1.03                   | -0.30                  |
| <i>mlaF</i> | ABC transporter maintaining OM lipid<br>asymmetry ATP-binding protein                                                                    | -0.22                                 | 1.18                  | 0.53                  | -0.20                | -0.43                   | -0.05                  |

| Gene        | COG Annotation                                                                  | Log <sub>2</sub> Fold Change of FPKM * |                       |                       |                      |                         |                        |
|-------------|---------------------------------------------------------------------------------|----------------------------------------|-----------------------|-----------------------|----------------------|-------------------------|------------------------|
|             |                                                                                 | Sertraline 1<br>mg/L                   | Sertraline 50<br>mg/L | Duloxetine 50<br>mg/L | Bupropion 50<br>mg/L | Escitalopram<br>50 mg/L | Agomelatine<br>50 mg/L |
| <i>mntP</i> | putative Mn(2+) efflux pump mntR-regulated                                      | 0.12                                   | 1.25                  | -0.28                 | -0.66                | -2.06                   | -1.57                  |
| <i>nikB</i> | nickel ABC transporter permease                                                 | 0.78                                   | 0.18                  | 1.66                  | 0.78                 | 0.70                    | -0.06                  |
| <i>oppA</i> | oligopeptide ABC transporter periplasmic binding protein                        | 0.34                                   | 1.52                  | 0.45                  | 0.76                 | 1.12                    | 0.32                   |
| <i>oppB</i> | oligopeptide ABC transporter permease                                           | 0.52                                   | 1.89                  | -1.02                 | 1.37                 | 0.83                    | 0.94                   |
| <i>oppC</i> | oligopeptide ABC transporter permease                                           | 0.74                                   | 1.27                  | 0.82                  | 0.92                 | 1.64                    | 1.08                   |
| <i>oppD</i> | oligopeptide ABC transporter ATPase                                             | 0.54                                   | 1.13                  | 0.33                  | 1.10                 | 1.25                    | 0.92                   |
| <i>phnC</i> | phosphonate ABC transporter ATPase                                              | 1.23                                   | 7.39                  | 0.59                  | 2.36                 | 0.56                    | 0.33                   |
| <i>phnD</i> | phosphonate ABC transporter periplasmic binding protein                         | 1.15                                   | 5.29                  | 1.66                  | 0.83                 | -0.39                   | 0.81                   |
| <i>pstA</i> | phosphate ABC transporter permease                                              | 0.30                                   | 5.23                  | 1.11                  | -0.37                | -0.26                   | -0.06                  |
| <i>pstB</i> | phosphate ABC transporter ATPase                                                | -0.73                                  | 4.22                  | -0.09                 | -0.92                | -1.07                   | -1.24                  |
| <i>pstC</i> | phosphate ABC transporter permease                                              | -0.25                                  | 5.24                  | 0.72                  | -0.70                | -0.99                   | -1.30                  |
| <i>pstS</i> | phosphate ABC transporter periplasmic binding protein                           | -0.71                                  | 7.48                  | 1.98                  | -0.66                | -1.30                   | -0.55                  |
| <i>rcnB</i> | periplasmic modulator of Ni and Co efflux                                       | -0.94                                  | 1.91                  | 1.33                  | -0.55                | -1.01                   | -1.05                  |
| <i>ssuB</i> | aliphatic sulfonate ABC transporter ATPase TatABCE protein translocation system | 0.63                                   | 1.03                  | 1.56                  | 0.17                 | 0.93                    | 0.87                   |
| <i>tatE</i> | subunit                                                                         | -1.26                                  | 1.97                  | 1.22                  | 1.01                 | 1.21                    | 0.78                   |
| <i>tolB</i> | periplasmic protein                                                             | -0.32                                  | 1.06                  | -0.10                 | -0.64                | -0.81                   | -0.97                  |
| <i>tolC</i> | transport channel                                                               | -0.40                                  | 0.88                  | 0.01                  | -0.29                | -0.30                   | -0.46                  |
| <i>tolR</i> | membrane spanning protein in TolA-TolQ-TolR complex                             | 0.07                                   | 1.76                  | 0.39                  | 0.07                 | -0.56                   | -0.54                  |
| <i>ybbA</i> | putative ABC transporter ATPase                                                 | 0.53                                   | 3.41                  | 1.02                  | -0.45                | 0.03                    | -0.27                  |
| <i>ybbP</i> | putative ABC transporter permease                                               | 0.19                                   | 2.33                  | 0.64                  | 0.00                 | 0.14                    | -0.33                  |
| <i>ybhS</i> | putative ABC transporter permease                                               | 0.93                                   | -1.17                 | -0.30                 | 1.14                 | 1.53                    | 0.87                   |
| <i>yciK</i> | putative EmrKY-TolC system oxoacyl-(acyl carrier protein) reductase             | 0.15                                   | 1.95                  | 0.54                  | -0.29                | -0.84                   | -0.22                  |
| <i>ydhI</i> | DUF1656 family putative inner membrane efflux pump associated protein           | 1.81                                   | 1.99                  | 2.21                  | 2.44                 | 3.43                    | 1.98                   |

\*: Comparing with the non-antidepressant control group

Table S7 Proteins related to efflux pump in *E. coli* MG1655 after exposure of antidepressants

| Protein | Description                            | Log <sub>2</sub> Fold Change of Protein Abundance* |                       |                       |                      |                         |                        |
|---------|----------------------------------------|----------------------------------------------------|-----------------------|-----------------------|----------------------|-------------------------|------------------------|
|         |                                        | Sertraline 1<br>mg/L                               | Sertraline 50<br>mg/L | Duloxetine 50<br>mg/L | Bupropion 50<br>mg/L | Escitalopram<br>50 mg/L | Agomelatine<br>50 mg/L |
| AcrA    | Multidrug efflux pump subunit          | 0.02                                               | 0.44                  | 0.02                  | 0.00                 | 0.13                    | 0.18                   |
| AcrB    | Multidrug efflux pump subunit          | 0.09                                               | 0.46                  | 0.17                  | 0.00                 | 0.11                    | 0.16                   |
| BamD    | Outer membrane protein assembly factor | 0.17                                               | 0.44                  | 0.36                  | 0.50                 | 0.08                    | 0.19                   |
| FtsN    | Cell division protein                  | 0.43                                               | 0.28                  | 0.30                  | 0.46                 | -0.13                   | 0.21                   |
| MdtA    | Multidrug resistance protein           | 0.30                                               | 2.31                  | 0.76                  | 0.01                 | 0.45                    | 0.43                   |
| PstB    | Phosphate import ATP-binding protein   | 0.22                                               | 2.18                  | 0.85                  | 0.25                 | 0.43                    | 0.61                   |
| PstS    | Phosphate-binding protein              | -0.28                                              | 2.42                  | 0.33                  | -0.29                | -0.21                   | 0.18                   |
| RcnB    | Nickel/cobalt homeostasis protein      | -0.02                                              | 1.23                  | 0.69                  | 0.10                 | 0.28                    | -0.20                  |
| TolA    | Tol-Pal system protein                 | -0.21                                              | 0.24                  | 0.19                  | -0.49                | 0.00                    | -0.10                  |
| TolB    | Tol-Pal system protein                 | -0.19                                              | 0.03                  | -0.05                 | -0.17                | -0.04                   | -0.19                  |
| TolC    | Outer membrane protein                 | 0.04                                               | -0.21                 | -0.31                 | 0.13                 | 0.02                    | 0.13                   |
| TolQ    | Tol-Pal system protein                 | -0.25                                              | 0.03                  | -0.28                 | -0.19                | 0.40                    | 0.73                   |
| TolR    | Tol-Pal system protein                 | -0.11                                              | -1.18                 | -0.91                 | -0.20                | -0.06                   | -0.23                  |
| YciK    | Uncharacterized oxidoreductase         | -0.38                                              | 0.37                  | 0.60                  | 0.24                 | 0.11                    | -0.16                  |

\*: Comparing with the non-antidepressant control group

Table S8 Genes related to efflux pump in antidepressant sertraline- induced (60 days) mutants, after the exposure of 50 mg/L sertraline

| Gene        | COG Annotation                                                                                         | Log <sub>2</sub> Fold Change of FPKM *   |                                       |                                        |                                      |                                           |                                        |                                         |                                       |
|-------------|--------------------------------------------------------------------------------------------------------|------------------------------------------|---------------------------------------|----------------------------------------|--------------------------------------|-------------------------------------------|----------------------------------------|-----------------------------------------|---------------------------------------|
|             |                                                                                                        | Sertraline 1<br>mg/L-<br>chloramphenicol | Sertraline<br>1 mg/L-<br>tetracycline | Sertraline 1<br>mg/L-<br>ciprofloxacin | Sertraline<br>1 mg/L-<br>amoxicillin | Sertraline 50<br>mg/L-<br>chloramphenicol | Sertraline<br>50 mg/L-<br>tetracycline | Sertraline 50<br>mg/L-<br>ciprofloxacin | Sertraline<br>50 mg/L-<br>amoxicillin |
| <i>acrA</i> | multidrug efflux system<br>multidrug efflux system                                                     | 0.15                                     | 0.03                                  | -0.01                                  | -0.30                                | 1.11                                      | 0.15                                   | 0.74                                    | 0.94                                  |
| <i>acrB</i> | protein<br>aminoglycoside/multidrug                                                                    | 0.73                                     | 0.70                                  | 0.42                                   | -0.05                                | 1.30                                      | 0.39                                   | 1.15                                    | 1.47                                  |
| <i>acrD</i> | efflux system                                                                                          | 3.35                                     | 1.50                                  | 1.47                                   | 2.61                                 | 1.19                                      | 0.98                                   | 0.26                                    | 0.52                                  |
| <i>acrR</i> | transcriptional repressor<br>BamABCDE complex OM<br>biogenesis outer membrane<br>pore-forming assembly | -0.76                                    | -1.20                                 | 0.30                                   | 0.14                                 | -0.34                                     | 1.24                                   | -0.09                                   | 0.13                                  |
| <i>bamA</i> | factor<br>copper/silver efflux system                                                                  | 0.90                                     | 0.59                                  | 0.00                                   | -0.24                                | 0.33                                      | 0.10                                   | -0.23                                   | 0.35                                  |
| <i>cusC</i> | outer membrane component                                                                               | -1.44                                    | -1.30                                 | -0.91                                  | -0.50                                | -0.25                                     | -0.98                                  | -0.93                                   | -1.05                                 |
| <i>emrA</i> | multidrug efflux system<br>multidrug efflux system                                                     | -0.44                                    | -0.71                                 | -0.75                                  | -0.38                                | -0.53                                     | -0.77                                  | -0.96                                   | -0.80                                 |
| <i>emrB</i> | protein<br>putative ABC transporter                                                                    | 0.43                                     | -0.06                                 | -0.49                                  | 0.31                                 | -0.77                                     | -0.57                                  | -0.55                                   | -0.40                                 |
| <i>ftsX</i> | permease<br>putative citrate/iron-<br>citrate/zinc-citrate efflux                                      | 0.88                                     | 0.44                                  | -0.02                                  | 0.70                                 | -0.17                                     | 0.14                                   | 0.07                                    | 0.03                                  |
| <i>iceT</i> | transporter<br>macrolide ABC transporter                                                               | 3.19                                     | -0.24                                 | -1.15                                  | 1.35                                 | 0.73                                      | -1.59                                  | 0.82                                    | 0.93                                  |
| <i>macB</i> | peremase/ATPase<br>multiple antibiotic resistance                                                      | 2.07                                     | 1.47                                  | 0.96                                   | 2.04                                 | -1.22                                     | 1.70                                   | 1.26                                    | 0.59                                  |
| <i>marA</i> | transcriptional regulator<br>multidrug efflux system                                                   | 1.43                                     | -0.54                                 | -0.62                                  | -0.37                                | 1.78                                      | -1.04                                  | 1.87                                    | 1.97                                  |
| <i>mdtA</i> | subunit A<br>multidrug efflux system                                                                   | 5.50                                     | 2.58                                  | 2.68                                   | 4.07                                 | 2.29                                      | 2.52                                   | 1.11                                    | 1.09                                  |
| <i>mdtB</i> | subunit B<br>multidrug efflux system                                                                   | 5.98                                     | 2.64                                  | 1.32                                   | 4.28                                 | 1.51                                      | 0.79                                   | 0.50                                    | 0.96                                  |
| <i>mdtC</i> | subunit C<br>anaerobic multidrug efflux                                                                | 5.09                                     | 1.38                                  | 0.48                                   | 3.15                                 | 0.72                                      | 0.00                                   | 0.30                                    | 0.86                                  |
| <i>mdtE</i> | transporter ArcA-regulated                                                                             | -1.39                                    | 0.47                                  | -0.16                                  | -2.84                                | -0.16                                     | -0.67                                  | -0.57                                   | -0.05                                 |



| Gene        | COG Annotation                                                                        | Log <sub>2</sub> Fold Change of FPKM *   |                                       |                                        |                                      |                                           |                                        |                                         |                                       |
|-------------|---------------------------------------------------------------------------------------|------------------------------------------|---------------------------------------|----------------------------------------|--------------------------------------|-------------------------------------------|----------------------------------------|-----------------------------------------|---------------------------------------|
|             |                                                                                       | Sertraline 1<br>mg/L-<br>chloramphenicol | Sertraline<br>1 mg/L-<br>tetracycline | Sertraline 1<br>mg/L-<br>ciprofloxacin | Sertraline<br>1 mg/L-<br>amoxicillin | Sertraline 50<br>mg/L-<br>chloramphenicol | Sertraline<br>50 mg/L-<br>tetracycline | Sertraline 50<br>mg/L-<br>ciprofloxacin | Sertraline 50<br>mg/L-<br>amoxicillin |
| <i>mdtF</i> | anaerobic multidrug efflux transporter ArcA-regulated multidrug efflux system protein | -1.48                                    | 0.33                                  | -0.17                                  | -2.20                                | -0.01                                     | -0.29                                  | -0.28                                   | 0.54                                  |
| <i>mdtM</i> | ABC transporter maintaining OM lipid asymmetry OM lipoprotein component               | -4.23                                    | -4.14                                 | -1.05                                  | -3.78                                | 0.27                                      | -1.87                                  | -1.95                                   | -1.59                                 |
| <i>miaA</i> | ABC transporter maintaining OM lipid asymmetry cytoplasmic STAS component             | 0.82                                     | 0.67                                  | 0.24                                   | 0.41                                 | 0.27                                      | -0.23                                  | 0.18                                    | 0.39                                  |
| <i>miaB</i> | ABC transporter maintaining OM lipid asymmetry periplasmic binding protein            | 1.18                                     | 1.09                                  | 0.46                                   | 1.07                                 | 0.73                                      | 0.20                                   | 0.69                                    | 0.67                                  |
| <i>miaC</i> | ABC transporter maintaining OM lipid asymmetry ATP-binding protein                    | 0.82                                     | 0.71                                  | 0.41                                   | 0.98                                 | 0.69                                      | 0.41                                   | 0.71                                    | 0.91                                  |
| <i>mntP</i> | putative Mn(2+) efflux pump mntR-regulated nickel ABC transporter permease            | -1.19                                    | -1.68                                 | -3.54                                  | -1.25                                | -1.35                                     | -2.04                                  | -1.74                                   | -1.60                                 |
| <i>nikB</i> | oligopeptide ABC transporter periplasmic binding protein                              | 1.81                                     | 1.88                                  | 1.08                                   | 1.53                                 | 1.74                                      | 0.97                                   | 1.62                                    | 1.26                                  |
| <i>oppA</i> | oligopeptide ABC transporter permease                                                 | 0.65                                     | 0.26                                  | 0.40                                   | 0.32                                 | 0.11                                      | 0.51                                   | 0.73                                    | 0.23                                  |
| <i>oppB</i> | oligopeptide ABC transporter permease                                                 | 0.00                                     | -1.86                                 | -0.48                                  | -0.16                                | -1.58                                     | -1.41                                  | -1.21                                   | -0.96                                 |
| <i>oppC</i> | oligopeptide ABC transporter permease                                                 | 0.28                                     | -0.35                                 | -1.24                                  | 0.18                                 | -1.31                                     | -0.80                                  | -0.35                                   | -0.46                                 |
| <i>oppD</i> | oligopeptide ABC transporter ATPase                                                   | 1.11                                     | 0.32                                  | -0.03                                  | 1.04                                 | 0.28                                      | 0.81                                   | 0.67                                    | 0.64                                  |

| Gene        | COG Annotation                                                                                           | Log <sub>2</sub> Fold Change of FPKM *   |                                       |                                        |                                      |                                           |                                        |                                         |                                       |
|-------------|----------------------------------------------------------------------------------------------------------|------------------------------------------|---------------------------------------|----------------------------------------|--------------------------------------|-------------------------------------------|----------------------------------------|-----------------------------------------|---------------------------------------|
|             |                                                                                                          | Sertraline 1<br>mg/L-<br>chloramphenicol | Sertraline<br>1 mg/L-<br>tetracycline | Sertraline 1<br>mg/L-<br>ciprofloxacin | Sertraline<br>1 mg/L-<br>amoxicillin | Sertraline 50<br>mg/L-<br>chloramphenicol | Sertraline<br>50 mg/L-<br>tetracycline | Sertraline 50<br>mg/L-<br>ciprofloxacin | Sertraline<br>50 mg/L-<br>amoxicillin |
| <i>phnC</i> | phosphonate ABC<br>transporter ATPase                                                                    | 4.99                                     | 5.63                                  | 1.35                                   | 7.01                                 | 1.92                                      | 1.51                                   | 0.84                                    | 1.77                                  |
| <i>phnD</i> | phosphonate ABC<br>transporter periplasmic<br>binding protein                                            | 4.40                                     | 3.59                                  | 1.47                                   | 5.83                                 | 1.08                                      | 1.18                                   | 0.55                                    | 0.12                                  |
| <i>pstA</i> | phosphate ABC transporter<br>permease                                                                    | 5.66                                     | 4.17                                  | 3.14                                   | 5.50                                 | 2.12                                      | 1.65                                   | 2.51                                    | 2.46                                  |
| <i>pstB</i> | phosphate ABC transporter<br>ATPase                                                                      | 5.31                                     | 3.66                                  | 2.35                                   | 5.26                                 | 1.45                                      | 1.39                                   | 2.15                                    | 1.69                                  |
| <i>pstC</i> | phosphate ABC transporter<br>permease                                                                    | 5.31                                     | 3.98                                  | 3.34                                   | 5.18                                 | 2.65                                      | 1.67                                   | 2.16                                    | 2.07                                  |
| <i>pstS</i> | phosphate ABC transporter<br>periplasmic binding protein<br>periplasmic modulator of Ni<br>and Co efflux | 7.34                                     | 6.70                                  | 6.13                                   | 7.32                                 | 4.91                                      | 5.00                                   | 4.61                                    | 4.39                                  |
| <i>rcnB</i> | aliphatic sulfonate ABC<br>transporter ATPase                                                            | 1.24                                     | 1.42                                  | 0.79                                   | 1.23                                 | 0.61                                      | 0.54                                   | 0.39                                    | 0.22                                  |
| <i>ssuB</i> | TatABCE protein                                                                                          | 0.99                                     | 0.74                                  | -0.36                                  | 0.36                                 | -0.20                                     | 0.69                                   | 1.25                                    | 0.56                                  |
| <i>tatE</i> | translocation system subunit                                                                             | 0.96                                     | 1.46                                  | 0.36                                   | -0.41                                | -0.78                                     | 0.74                                   | 0.63                                    | 0.06                                  |
| <i>tolB</i> | periplasmic protein                                                                                      | 0.77                                     | -0.03                                 | 0.29                                   | 0.67                                 | 0.40                                      | -0.01                                  | -0.18                                   | -0.42                                 |
| <i>tolC</i> | transport channel                                                                                        | 0.69                                     | 1.48                                  | 1.15                                   | 0.20                                 | 1.31                                      | 0.52                                   | 0.60                                    | 0.55                                  |
| <i>tolR</i> | membrane spanning protein<br>in TolA-TolQ-TolR<br>complex                                                | 1.70                                     | 0.06                                  | 0.25                                   | 1.81                                 | 0.64                                      | -0.23                                  | 0.61                                    | 1.25                                  |
| <i>ybbA</i> | putative ABC transporter<br>ATPase                                                                       | 3.72                                     | 2.59                                  | 1.55                                   | 2.06                                 | 0.69                                      | 1.34                                   | 0.88                                    | 0.10                                  |
| <i>ybbP</i> | putative ABC transporter<br>permease                                                                     | 2.26                                     | 1.01                                  | 0.50                                   | 0.79                                 | 0.34                                      | 0.16                                   | -0.30                                   | 0.20                                  |
| <i>ybhS</i> | putative ABC transporter<br>permease                                                                     | 0.44                                     | 0.24                                  | -0.72                                  | 0.36                                 | -0.59                                     | -0.66                                  | -0.22                                   | 0.22                                  |
| <i>yciK</i> | putative EmrKY-TolC<br>system oxoacyl-(acyl carrier<br>protein) reductase                                | 1.97                                     | 1.71                                  | 1.37                                   | 1.94                                 | 0.92                                      | 1.26                                   | 0.82                                    | 0.51                                  |

| Gene        | COG Annotation                                                              | Log <sub>2</sub> Fold Change of FPKM *   |                                       |                                        |                                      |                                           |                                        |                                         |                                       |
|-------------|-----------------------------------------------------------------------------|------------------------------------------|---------------------------------------|----------------------------------------|--------------------------------------|-------------------------------------------|----------------------------------------|-----------------------------------------|---------------------------------------|
|             |                                                                             | Sertraline 1<br>mg/L-<br>chloramphenicol | Sertraline<br>1 mg/L-<br>tetracycline | Sertraline 1<br>mg/L-<br>ciprofloxacin | Sertraline<br>1 mg/L-<br>amoxicillin | Sertraline 50<br>mg/L-<br>chloramphenicol | Sertraline<br>50 mg/L-<br>tetracycline | Sertraline 50<br>mg/L-<br>ciprofloxacin | Sertraline<br>50 mg/L-<br>amoxicillin |
| <i>ydhI</i> | DUF1656 family putative<br>inner membrane efflux<br>pump associated protein | -2.83                                    | -4.72                                 | -2.47                                  | -2.33                                | -0.80                                     | -1.71                                  | -4.62                                   | -1.62                                 |

\*: Comparing with the mutant control group without any sertraline dosage

Table S9 Proteins related to efflux pump in antidepressant sertraline- induced (60 days) mutants, after the exposure of 50 mg/L sertraline

| Protein | Description                               | Log <sub>2</sub> Fold Change of FPKM *   |                                       |                                        |                                      |                                           |                                        |                                         |                                       |
|---------|-------------------------------------------|------------------------------------------|---------------------------------------|----------------------------------------|--------------------------------------|-------------------------------------------|----------------------------------------|-----------------------------------------|---------------------------------------|
|         |                                           | Sertraline 1<br>mg/L-<br>chloramphenicol | Sertraline<br>1 mg/L-<br>tetracycline | Sertraline 1<br>mg/L-<br>ciprofloxacin | Sertraline<br>1 mg/L-<br>amoxicillin | Sertraline 50<br>mg/L-<br>chloramphenicol | Sertraline<br>50 mg/L-<br>tetracycline | Sertraline 50<br>mg/L-<br>ciprofloxacin | Sertraline<br>50 mg/L-<br>amoxicillin |
| AcrA    | Multidrug efflux pump<br>subunit          | -1.61                                    | -0.72                                 | -2.74                                  | 0.51                                 | 0.22                                      | 0.30                                   | -0.42                                   | -0.61                                 |
| AcrB    | Multidrug efflux pump<br>subunit          | -1.50                                    | -0.56                                 | -2.66                                  | 0.55                                 | 0.46                                      | 0.45                                   | -0.35                                   | 0.09                                  |
| BamD    | Outer membrane protein<br>assembly factor | 0.28                                     | 0.50                                  | 0.75                                   | 0.53                                 | 0.36                                      | 0.34                                   | 0.05                                    | -0.07                                 |
| FtsN    | Cell division protein                     | -0.23                                    | 0.13                                  | -0.97                                  | -0.21                                | 0.00                                      | 0.22                                   | -0.39                                   | -0.73                                 |
| MdtA    | Multidrug resistance<br>protein           | 1.51                                     | -0.26                                 | 1.66                                   | 0.54                                 | -2.12                                     | -6.64                                  | 0.11                                    | -6.64                                 |
| PstB    | Phosphate import ATP-<br>binding protein  | 2.02                                     | 1.44                                  | 1.60                                   | 1.11                                 | 0.94                                      | 1.67                                   | 1.48                                    | 1.13                                  |
| PstS    | Phosphate-binding protein                 | 3.05                                     | 2.38                                  | 2.64                                   | 0.42                                 | 0.62                                      | 0.35                                   | 2.05                                    | -0.05                                 |
| RcnB    | Nickel/cobalt homeostasis<br>protein      | 0.87                                     | 1.16                                  | 0.69                                   | 0.15                                 | 0.09                                      | 0.70                                   | 0.72                                    | -0.37                                 |
| TolA    | Tol-Pal system protein                    | 0.14                                     | 0.20                                  | 0.21                                   | 0.05                                 | -0.01                                     | 0.23                                   | 0.35                                    | -0.38                                 |
| TolB    | Tol-Pal system protein                    | 0.08                                     | 0.01                                  | 0.63                                   | 0.03                                 | -0.42                                     | -0.41                                  | 0.45                                    | -0.76                                 |
| TolC    | Outer membrane protein                    | 0.19                                     | 1.09                                  | -1.48                                  | 1.17                                 | 0.35                                      | 0.62                                   | -0.17                                   | -0.70                                 |
| TolQ    | Tol-Pal system protein                    | 0.53                                     | 0.41                                  | 0.25                                   | 0.41                                 | 0.95                                      | 0.39                                   | 0.24                                    | 1.70                                  |
| TolR    | Tol-Pal system protein                    | -0.03                                    | 0.05                                  | 0.48                                   | 0.63                                 | 0.42                                      | 0.03                                   | 0.32                                    | 0.19                                  |
| YciK    | Uncharacterized<br>oxidoreductase         | 0.47                                     | 0.95                                  | 0.17                                   | 0.89                                 | 0.09                                      | 0.57                                   | 0.32                                    | -0.56                                 |

\*: Comparing with the mutant control group without any sertraline dosage

Table S10 Genes related to membrane in *E. coli* MG1655 after exposure of antidepressants

| Gene        | COG Annotation                                                                                                                                                                | Log <sub>2</sub> Fold Change of FPKM* |                       |                       |                      |                         |                        |
|-------------|-------------------------------------------------------------------------------------------------------------------------------------------------------------------------------|---------------------------------------|-----------------------|-----------------------|----------------------|-------------------------|------------------------|
|             |                                                                                                                                                                               | Sertraline 1<br>mg/L                  | Sertraline 50<br>mg/L | Duloxetine<br>50 mg/L | Bupropion<br>50 mg/L | Escitalopram<br>50 mg/L | Agomelatine<br>50 mg/L |
| <i>alx</i>  | putative membrane-bound redox modulator<br>suppressor of OmpF assembly mutants putative<br>outer membrane protein assembly factor inner                                       | -1.28                                 | 1.94                  | -1.08                 | -1.17                | -1.73                   | -1.37                  |
| <i>asma</i> | membrane-anchored periplasmic protein                                                                                                                                         | -0.24                                 | -1.12                 | -0.50                 | -0.03                | 0.07                    | -0.43                  |
| <i>exbB</i> | membrane spanning protein in TonB-ExbB-<br>ExbD complex                                                                                                                       | 0.03                                  | -2.39                 | -1.02                 | -0.39                | -1.26                   | -0.47                  |
| <i>exbD</i> | membrane spanning protein in TonB-ExbB-<br>ExbD complex                                                                                                                       | 0.03                                  | -1.99                 | -1.18                 | -0.38                | -0.75                   | -0.33                  |
| <i>fecA</i> | TonB-dependent outer membrane ferric citrate<br>transporter and signal transducer ferric citrate<br>extracellular receptor FecR-interacting protein                           | 0.41                                  | -1.91                 | -0.47                 | -0.22                | -0.68                   | 0.02                   |
| <i>fecR</i> | anti-sigma transmembrane signal transducer for<br>ferric citrate transport periplasmic FecA-bound<br>ferric citrate sensor and cytoplasmic FecI ECF<br>sigma factor activator | 0.29                                  | -3.44                 | -1.41                 | -0.31                | -1.25                   | 0.21                   |
| <i>ftsL</i> | membrane bound cell division leucine zipper<br>septum protein                                                                                                                 | 0.67                                  | 1.08                  | 0.51                  | 0.45                 | 0.79                    | 0.20                   |
| <i>ftsQ</i> | divisome assembly protein membrane anchored<br>protein involved in growth of wall at septum                                                                                   | 0.87                                  | 1.34                  | 1.10                  | 0.62                 | 0.61                    | 0.64                   |
| <i>lamB</i> | maltose outer membrane porin (maltoporin)                                                                                                                                     | 0.04                                  | -1.13                 | 0.20                  | -0.25                | -0.50                   | -0.45                  |
| <i>ompA</i> | outer membrane protein A                                                                                                                                                      | 0.52                                  | 0.71                  | 0.94                  | 0.34                 | -0.74                   | 0.97                   |
| <i>ompC</i> | outer membrane porin protein C                                                                                                                                                | 0.04                                  | -0.99                 | 0.13                  | 0.16                 | -0.15                   | 0.14                   |
| <i>ompF</i> | outer membrane porin 1a                                                                                                                                                       | -1.73                                 | -3.32                 | -3.20                 | -2.12                | -2.70                   | -2.46                  |
| <i>ompG</i> | outer membrane porin G                                                                                                                                                        | -0.06                                 | -0.41                 | -1.66                 | -2.11                | -0.99                   | -2.36                  |
| <i>ompN</i> | outer membrane pore protein N non-specific<br>response regulator in two-component regulatory                                                                                  | -1.16                                 | 2.29                  | 0.47                  | -0.35                | -0.10                   | -0.52                  |
| <i>ompR</i> | system with EnvZ<br>DLP12 prophage outer membrane protease VII                                                                                                                | -0.10                                 | 2.47                  | 0.44                  | -0.04                | -0.38                   | 0.64                   |
| <i>ompT</i> | outer membrane protein 3b                                                                                                                                                     | -0.37                                 | -3.22                 | -1.40                 | -1.17                | -2.24                   | -1.01                  |
| <i>ompW</i> | outer membrane protein W                                                                                                                                                      | 0.63                                  | 0.03                  | 0.33                  | 1.20                 | 2.02                    | 1.08                   |
| <i>ompX</i> | outer membrane protein X                                                                                                                                                      | 0.29                                  | 2.53                  | 1.27                  | 0.69                 | -0.27                   | 1.05                   |
| <i>phoE</i> | outer membrane phosphoporin protein E                                                                                                                                         | -0.47                                 | 2.09                  | -0.93                 | -1.91                | -1.28                   | -0.86                  |

| Gene        | COG Annotation                                                    | Log <sub>2</sub> Fold Change of FPKM * |                       |                       |                      |                         |                        |
|-------------|-------------------------------------------------------------------|----------------------------------------|-----------------------|-----------------------|----------------------|-------------------------|------------------------|
|             |                                                                   | Sertraline 1<br>mg/L                   | Sertraline 50<br>mg/L | Duloxetine<br>50 mg/L | Bupropion<br>50 mg/L | Escitalopram<br>50 mg/L | Agomelatine<br>50 mg/L |
| <i>tonB</i> | membrane spanning protein in TonB-ExbB-<br>ExbD transport complex | -0.44                                  | -1.27                 | -0.68                 | -0.47                | -0.98                   | -0.61                  |
| <i>yddB</i> | putative TonB-dependent outer membrane<br>receptor                | 0.13                                   | -1.20                 | 0.28                  | 0.13                 | -0.75                   | 0.65                   |

\*: Comparing with the non-antidepressant control group

Table S11 Proteins related to membrane in *E. coli* MG1655 after exposure of antidepressants

| Protein | Description                                              | Log <sub>2</sub> Fold Change of Protein Abundance* |                       |                       |                      |                         |                        |
|---------|----------------------------------------------------------|----------------------------------------------------|-----------------------|-----------------------|----------------------|-------------------------|------------------------|
|         |                                                          | Sertraline 1<br>mg/L                               | Sertraline 50<br>mg/L | Duloxetine 50<br>mg/L | Bupropion 50<br>mg/L | Escitalopram<br>50 mg/L | Agomelatine<br>50 mg/L |
| AsmA    | Membrane porin                                           | -0.04                                              | -0.29                 | -0.16                 | -0.05                | 0.24                    | 0.08                   |
| FtsA    | Cell division protein                                    | -0.12                                              | 0.44                  | 0.12                  | -0.30                | 0.57                    | -0.30                  |
| FtsE    | Cell division ATP-binding protein                        | -0.10                                              | 0.29                  | 0.05                  | -0.10                | 0.09                    | 0.05                   |
| FtsH    | ATP-dependent protein                                    | -0.01                                              | -0.09                 | 0.05                  | 0.05                 | 0.09                    | 0.15                   |
| FtsN    | Cell division protein                                    | 0.43                                               | 0.28                  | 0.30                  | 0.46                 | -0.13                   | 0.21                   |
| FtsZ    | Cell division protein                                    | -0.05                                              | 0.44                  | 0.20                  | -0.02                | 0.17                    | 0.05                   |
| OmpA    | Outer membrane protein A                                 | 0.33                                               | 0.21                  | 0.32                  | 0.64                 | 0.01                    | 0.18                   |
| OmpC    | Outer membrane porin C                                   | 0.31                                               | 0.05                  | -0.03                 | 0.46                 | -0.13                   | -0.02                  |
| OmpF    | Outer membrane porin F                                   | 0.16                                               | 0.15                  | 0.04                  | 0.18                 | -0.35                   | -0.09                  |
| OmpR    | Transcriptional regulatory protein                       | -0.22                                              | 0.98                  | 0.60                  | -0.27                | 0.12                    | -0.02                  |
| OmpT    | Protease                                                 | 0.02                                               | -1.80                 | -1.37                 | 0.17                 | -0.08                   | -0.26                  |
| OmpW    | Outer membrane protein W                                 | 0.23                                               | 0.05                  | 0.19                  | 0.25                 | 0.02                    | -0.16                  |
| OmpX    | Outer membrane protein X                                 | 0.40                                               | 0.89                  | 1.00                  | 0.63                 | -0.04                   | -0.03                  |
| PhoA    | Alkaline phosphatase                                     | 0.18                                               | 0.12                  | -0.95                 | 0.03                 | 0.20                    | 0.42                   |
| PhoP    | Transcriptional regulatory protein                       | -0.06                                              | -0.12                 | -0.01                 | -0.08                | 0.20                    | 0.20                   |
| PhoQ    | Sensor protein                                           | -0.26                                              | -1.07                 | -0.40                 | 0.09                 | 0.23                    | 0.42                   |
| PhoU    | Phosphate-specific transport system<br>accessory protein | -0.03                                              | 1.92                  | 0.35                  | -0.13                | 0.31                    | 0.29                   |

\*: Comparing with the non-antidepressant control group

Table S12 Genes related to membrane in antidepressant sertraline- induced (60 days) mutants, after the exposure of 50 mg/L sertraline

| Gene        | COG Annotation                                                                                                                                                       | Log <sub>2</sub> Fold Change of FPKM* |                                 |                                  |                                |                                     |                                  |                                   |                                 |
|-------------|----------------------------------------------------------------------------------------------------------------------------------------------------------------------|---------------------------------------|---------------------------------|----------------------------------|--------------------------------|-------------------------------------|----------------------------------|-----------------------------------|---------------------------------|
|             |                                                                                                                                                                      | Sertraline 1 mg/L- chloramphenicol    | Sertraline 1 mg/L- tetracycline | Sertraline 1 mg/L- ciprofloxacin | Sertraline 1 mg/L- amoxicillin | Sertraline 50 mg/L- chloramphenicol | Sertraline 50 mg/L- tetracycline | Sertraline 50 mg/L- ciprofloxacin | Sertraline 50 mg/L- amoxicillin |
| <i>alx</i>  | putative membrane-bound redox modulator                                                                                                                              | 2.73                                  | 0.11                            | 0.03                             | 0.95                           | 0.05                                | -0.11                            | -1.35                             | -0.76                           |
| <i>asma</i> | suppressor of OmpF assembly mutants putative outer membrane protein assembly factor inner membrane-anchored periplasmic protein                                      | -0.50                                 | -0.19                           | -0.35                            | -0.53                          | -0.72                               | -0.12                            | -0.12                             | 0.00                            |
| <i>exbB</i> | membrane spanning protein in TonB-ExbB-ExbD complex                                                                                                                  | -2.09                                 | -1.60                           | -1.57                            | -2.00                          | -1.31                               | -1.48                            | -0.72                             | -1.35                           |
| <i>exbD</i> | membrane spanning protein in TonB-ExbB-ExbD complex                                                                                                                  | -2.00                                 | -1.86                           | -1.41                            | -1.91                          | -1.59                               | -1.72                            | -0.89                             | -1.19                           |
| <i>fecA</i> | TonB-dependent outer membrane ferric citrate transporter and signal transducer ferric citrate extracellular receptor FecR-interacting protein                        | -0.48                                 | 0.01                            | -0.39                            | -0.38                          | -0.90                               | -0.27                            | -0.32                             | -0.27                           |
| <i>fecR</i> | anti-sigma transmembrane signal transducer for ferric citrate transport periplasmic FecA-bound ferric citrate sensor and cytoplasmic FecI ECF sigma factor activator | -1.80                                 | -1.13                           | -1.81                            | -0.82                          | -1.15                               | -2.86                            | 0.09                              | -0.90                           |
| <i>ftsL</i> | membrane bound cell division leucine zipper septum protein                                                                                                           | 0.76                                  | 0.73                            | -0.09                            | 1.45                           | 0.33                                | 0.22                             | 0.44                              | 0.20                            |
| <i>ftsQ</i> | divisome assembly protein membrane anchored protein involved in growth of wall at septum                                                                             | 0.78                                  | 0.65                            | 0.42                             | 0.82                           | -0.14                               | 0.62                             | 0.61                              | 0.34                            |
| <i>lamB</i> | maltose outer membrane porin (maltoporin)                                                                                                                            | -1.42                                 | 0.23                            | 1.05                             | -0.78                          | 1.19                                | 0.07                             | 3.31                              | 0.13                            |
| <i>ompA</i> | outer membrane protein A                                                                                                                                             | 0.55                                  | 0.98                            | 1.43                             | 1.33                           | 1.37                                | 0.97                             | 1.80                              | 0.89                            |
| <i>ompC</i> | outer membrane porin protein C                                                                                                                                       | -0.24                                 | 0.78                            | 1.19                             | -0.92                          | 0.98                                | 0.85                             | 1.34                              | 0.21                            |
| <i>ompF</i> | outer membrane porin 1a                                                                                                                                              | -2.37                                 | -2.06                           | -1.73                            | -2.08                          | -1.76                               | -1.37                            | -2.09                             | -1.92                           |
| <i>ompG</i> | outer membrane porin G                                                                                                                                               | -1.92                                 | -1.31                           | -0.33                            | -0.26                          | -4.67                               | -1.78                            | 6.66                              | -0.81                           |



| Gene        | COG Annotation                                                       | Log <sub>2</sub> Fold Change of FPKM * |                                |                                 |                               |                                    |                                 |                                  |                                |
|-------------|----------------------------------------------------------------------|----------------------------------------|--------------------------------|---------------------------------|-------------------------------|------------------------------------|---------------------------------|----------------------------------|--------------------------------|
|             |                                                                      | Sertraline 1 mg/L-chloramphenicol      | Sertraline 1 mg/L-tetracycline | Sertraline 1 mg/L-ciprofloxacin | Sertraline 1 mg/L-amoxicillin | Sertraline 50 mg/L-chloramphenicol | Sertraline 50 mg/L-tetracycline | Sertraline 50 mg/L-ciprofloxacin | Sertraline 50 mg/L-amoxicillin |
| <i>ompN</i> | outer membrane pore protein N non-specific                           | 0.70                                   | 2.31                           | 0.59                            | 1.52                          | 1.53                               | 0.08                            | 2.11                             | 1.52                           |
| <i>ompR</i> | response regulator in two-component regulatory system with EnvZ      | 1.01                                   | 0.76                           | 0.35                            | 0.51                          | 0.93                               | 0.23                            | 1.01                             | 0.66                           |
| <i>ompT</i> | DLP12 prophage outer membrane protease VII outer membrane protein 3b | -0.38                                  | 0.04                           | 0.07                            | -1.88                         | -0.30                              | 1.01                            | 1.14                             | 0.93                           |
| <i>ompW</i> | outer membrane protein W                                             | 0.93                                   | 1.24                           | 1.73                            | 0.96                          | 1.28                               | 1.61                            | 2.91                             | 0.89                           |
| <i>ompX</i> | outer membrane protein X                                             | 1.85                                   | 1.79                           | 1.34                            | 2.16                          | 1.10                               | 0.63                            | 0.46                             | 0.67                           |
| <i>phoE</i> | outer membrane phosphoprotein E                                      | 0.78                                   | -0.30                          | -1.63                           | 1.51                          | -0.99                              | -0.85                           | -0.15                            | -1.70                          |
| <i>tonB</i> | membrane spanning protein in TonB-ExbB-ExbD transport complex        | -0.98                                  | -0.54                          | -0.42                           | -1.38                         | -0.63                              | -1.18                           | 0.19                             | -0.31                          |
| <i>yddB</i> | putative TonB-dependent outer membrane receptor                      | -1.42                                  | -2.18                          | -1.72                           | -1.43                         | -1.78                              | -1.72                           | -0.74                            | -1.38                          |

\*: Comparing with the mutant control group without any sertraline dosage

Table S13 Proteins related to membrane in antidepressant sertraline- induced (60 days) mutants, after the exposure of 50 mg/L sertraline

| Protein | Description                                           | Log <sub>2</sub> Fold Change of FPKM * |                                 |                                  |                                |                                     |                                  |                                   |                                 |
|---------|-------------------------------------------------------|----------------------------------------|---------------------------------|----------------------------------|--------------------------------|-------------------------------------|----------------------------------|-----------------------------------|---------------------------------|
|         |                                                       | Sertraline 1 mg/L- chloramphenicol     | Sertraline 1 mg/L- tetracycline | Sertraline 1 mg/L- ciprofloxacin | Sertraline 1 mg/L- amoxicillin | Sertraline 50 mg/L- chloramphenicol | Sertraline 50 mg/L- tetracycline | Sertraline 50 mg/L- ciprofloxacin | Sertraline 50 mg/L- amoxicillin |
| AsmA    | Membrane porin                                        | -0.09                                  | 0.00                            | 0.14                             | 0.07                           | -0.19                               | -0.05                            | -0.19                             | -0.06                           |
| FtsA    | Cell division protein                                 | 1.61                                   | 0.45                            | 1.65                             | 2.44                           | -2.08                               | -1.65                            | 0.93                              | 1.27                            |
| FtsE    | Cell division ATP-binding protein                     | 0.22                                   | 0.60                            | 0.44                             | 0.33                           | 0.59                                | 0.77                             | 0.06                              | 0.32                            |
| FtsH    | ATP-dependent protein                                 | 0.31                                   | 0.57                            | 0.32                             | 0.24                           | 0.54                                | 0.60                             | -0.08                             | 0.22                            |
| FtsN    | Cell division protein                                 | -0.23                                  | 0.13                            | -0.21                            | -0.97                          | 0.00                                | 0.22                             | -0.73                             | -0.39                           |
| FtsZ    | Cell division protein                                 | 0.29                                   | 0.27                            | 0.41                             | 0.79                           | -0.03                               | -0.02                            | -0.34                             | 0.35                            |
| OmpA    | Outer membrane protein A                              | 0.31                                   | 0.20                            | 0.58                             | 1.07                           | 0.23                                | 0.20                             | 0.24                              | 0.45                            |
| OmpC    | Outer membrane porin C                                | -0.09                                  | -0.50                           | -0.02                            | -1.31                          | 0.01                                | 0.07                             | -1.07                             | -0.80                           |
| OmpF    | Outer membrane porin F                                | 1.94                                   | 0.05                            | -0.34                            | 2.65                           | -0.44                               | -1.25                            | -2.35                             | 0.82                            |
| OmpR    | Transcriptional regulatory protein                    | -0.86                                  | -0.22                           | -0.66                            | -0.99                          | -0.22                               | -0.94                            | -1.12                             | -0.72                           |
| OmpT    | Protease                                              | 0.67                                   | 0.26                            | 0.47                             | 1.65                           | -1.35                               | -0.23                            | 0.31                              | 0.08                            |
| OmpW    | Outer membrane protein W                              | -0.29                                  | -0.80                           | -0.15                            | 0.03                           | -0.26                               | 0.04                             | 0.21                              | 0.02                            |
| OmpX    | Outer membrane protein X                              | 0.36                                   | 0.95                            | 0.91                             | 1.08                           | -0.22                               | -0.13                            | 0.39                              | -0.54                           |
| PhoA    | Alkaline phosphatase                                  | 1.58                                   | 1.06                            | -0.42                            | 0.48                           | 0.02                                | 0.23                             | 0.64                              | 0.21                            |
| PhoP    | Transcriptional regulatory protein                    | -0.38                                  | -0.62                           | -0.47                            | 0.03                           | -0.36                               | -0.81                            | -1.84                             | 0.06                            |
| PhoU    | Phosphate-specific transport system accessory protein | 1.89                                   | 0.94                            | 0.43                             | 1.84                           | 0.01                                | 0.21                             | -0.47                             | 0.77                            |

\*: Comparing with the mutant control group without any sertraline dosage



| Gene Name   | Position                           | Gene No | Gene +/- | Summary                                                                                                        | Wild-type <i>E. coli</i>                                          | Sertraline 50 mg/L (15-day)                                       | Sertraline 50 mg/L (30-day) | Sertraline 50 mg/L (60-day)                                       | Duloxetine 50 mg/L (15-day)                                       | Duloxetine 50 mg/L (30-day)                                       | Duloxetine 50 mg/L (60-day) | Bupropion 100 mg/L (30-day)                                       | Escitalopram 100 mg/L (30-day)                                    | Agomelatine 100 mg/L (30-day)                                     |
|-------------|------------------------------------|---------|----------|----------------------------------------------------------------------------------------------------------------|-------------------------------------------------------------------|-------------------------------------------------------------------|-----------------------------|-------------------------------------------------------------------|-------------------------------------------------------------------|-------------------------------------------------------------------|-----------------------------|-------------------------------------------------------------------|-------------------------------------------------------------------|-------------------------------------------------------------------|
| <i>yhjC</i> | 3672693 & 3672694                  | 3587    | +        | LysR family putative transcriptional regulator (Note: putative transcriptional regulator LYSR-type)            | AAAT <b>T</b>                                                     |                                                                   |                             | AAAT <b>G</b>                                                     |                                                                   |                                                                   | AAAT <b>G</b>               |                                                                   | AAAT <b>G</b>                                                     | AAAT <b>G</b>                                                     |
| <i>yiaL</i> | 3743946 & 3743948                  | 3648    | +        | DUF386 family protein (Note: putative lipase)                                                                  | <b>TATCGATATTC</b>                                                |                                                                   |                             | <b>GAGCGATATTC</b>                                                |                                                                   |                                                                   |                             |                                                                   | <b>GAGCGATATTC</b>                                                |                                                                   |
| <i>lamB</i> | 4248598                            | 4119    | +        | maltose outer membrane porin (maltoporin) (Note: phage lambda receptor protein maltose high-affinity receptor) | ACCCGGGC <b>G</b> GC                                              |                                                                   | ACCCGGGC <b>A</b> GC        |                                                                   |                                                                   |                                                                   |                             | ACCCGGGC <b>A</b> GC                                              |                                                                   |                                                                   |
| <i>ssb</i>  | 4274329 & 4274336 & 4143 & 4274350 |         | +        | single-stranded DNA-binding protein (Note: ssDNA-binding protein)                                              | GGCG <b>A</b> GCGAAT<br><b>A</b> TCTGCGTAAA<br>GGT <b>T</b> CTCAG | GGCG <b>G</b> GCGAAT<br><b>G</b> TCTGCGTAAA<br>GGT <b>G</b> CTCAG |                             | GGCG <b>G</b> GCGAAT<br><b>G</b> TCTGCGTAAA<br>GGT <b>G</b> CTCAG | GGCG <b>G</b> GCGAAT<br><b>G</b> TCTGCGTAAA<br>GGT <b>G</b> CTCAG | GGCG <b>G</b> GCGAAT<br><b>G</b> TCTGCGTAAA<br>GGT <b>G</b> CTCAG |                             | GGCG <b>G</b> GCGAAT<br><b>G</b> TCTGCGTAAA<br>GGT <b>G</b> CTCAG | GGCG <b>G</b> GCGAAT<br><b>G</b> TCTGCGTAAA<br>GGT <b>G</b> CTCAG | GGCG <b>G</b> GCGAAT<br><b>G</b> TCTGCGTAAA<br>GGT <b>G</b> CTCAG |
| <i>rob</i>  | 4635103                            | 4490    | -        | right oriC-binding transcriptional activator AraC family (Note: right origin-binding protein)                  | TAC <b>C</b> GCCTTTA                                              |                                                                   |                             |                                                                   |                                                                   |                                                                   | TAC <b>T</b> CCTTTA         |                                                                   |                                                                   |                                                                   |





| Gene Name   | Position                          | Gene No. | Gene +/- | Summary                                                                                                        | Wild-type <i>E. coli</i>                                      | Sertraline 50 mg/L (1-day)                                                 |                                                                            | Sertraline 1 mg/L (60-day)                                                 |                                                                            | Sertraline 50 mg/L(30-day)                                                 |                                                                            | Sertraline 50 mg/L (60-day)                                                |                                                                            |                                                                            | Duloxetine 50 mg/L (30-day)                                                | Bupropion 100 mg/L (30-day)                                                | Escitalopram 50 mg/L (30-day) |
|-------------|-----------------------------------|----------|----------|----------------------------------------------------------------------------------------------------------------|---------------------------------------------------------------|----------------------------------------------------------------------------|----------------------------------------------------------------------------|----------------------------------------------------------------------------|----------------------------------------------------------------------------|----------------------------------------------------------------------------|----------------------------------------------------------------------------|----------------------------------------------------------------------------|----------------------------------------------------------------------------|----------------------------------------------------------------------------|----------------------------------------------------------------------------|----------------------------------------------------------------------------|-------------------------------|
|             |                                   |          |          |                                                                                                                |                                                               | Chloramphenicol                                                            | Tetracycline                                                               | Chloramphenicol                                                            | Tetracycline                                                               | Chloramphenicol                                                            | Chloramphenicol                                                            | Tetracycline                                                               | Ciprofloxacin                                                              | Amoxicillin                                                                | Chloramphenicol                                                            | Chloramphenicol                                                            | Chloramphenicol               |
| <i>yfbN</i> | 2388374                           | 2330     | -        | uncharacterized protein                                                                                        | GAC <b>C</b> TATGGC<br>T                                      | GAC <b>C</b> CAT<br>GGCT                                                   |                                                                            |                                                                            |                                                                            |                                                                            |                                                                            |                                                                            |                                                                            |                                                                            |                                                                            |                                                                            |                               |
| <i>nuoF</i> | 2400563                           | 2341     | +        | quinone oxidoreductase subunit F                                                                               | TTG <b>A</b> CCATGA<br>G                                      |                                                                            |                                                                            |                                                                            |                                                                            |                                                                            |                                                                            |                                                                            |                                                                            |                                                                            |                                                                            |                                                                            | TTG <b>C</b> CA<br>TGAG       |
| <i>gshA</i> | 2815806                           | 2748     | -        | glutamate--cysteine ligase                                                                                     | AGGAAA <b>A</b> CCA<br>A                                      |                                                                            |                                                                            |                                                                            |                                                                            |                                                                            |                                                                            |                                                                            |                                                                            | AGGAAA <b>T</b><br>CCAA                                                    | AGGAAA <b>T</b><br>CCAA                                                    |                                                                            |                               |
| <i>gcvP</i> | 3048716                           | 2966     | -        | glycine decarboxylase                                                                                          | TGGTAT <b>A</b> CCG<br>C                                      |                                                                            |                                                                            |                                                                            |                                                                            |                                                                            |                                                                            |                                                                            |                                                                            | TGGTAT <b>T</b><br>CCGC                                                    | TGGTAT <b>T</b><br>CCGC                                                    |                                                                            |                               |
| <i>yhhH</i> | 3623538                           | 3544     | +        | putative NTF2 fold immunity protein for polymorphic toxin RhsB                                                 | AAG <b>G</b> TAAATA<br>T                                      |                                                                            |                                                                            |                                                                            |                                                                            | AAG <b>C</b> TAA<br>ATAT                                                   |                                                                            | AAG <b>C</b> TAA<br>ATAT                                                   |                                                                            |                                                                            |                                                                            |                                                                            |                               |
| <i>gor</i>  | 3647512                           | 3561     | +        | glutathione oxidoreductase                                                                                     | TAT <b>T</b> CACGGC<br>A                                      | TAG <b>T</b> CAC<br>GGCA                                                   |                                                                            |                                                                            |                                                                            |                                                                            |                                                                            |                                                                            |                                                                            |                                                                            |                                                                            |                                                                            |                               |
| <i>yhjC</i> | 3672693 &<br>3672694              | 3587     | +        | LysR family putative transcriptional regulator (Note: putative transcriptional regulator LYSR-type)            | AA <b>A</b> T <b>T</b>                                        |                                                                            | AA <b>A</b> T <b>G</b>                                                     |                                                                            |                                                                            |                                                                            |                                                                            |                                                                            |                                                                            | AA <b>A</b> T <b>G</b>                                                     | AA <b>A</b> T <b>G</b>                                                     | AA <b>A</b> T <b>G</b>                                                     |                               |
| <i>yhjD</i> | 3674037 &<br>3674038              | 3588     | +        | inner membrane putative BrbK family alternate lipid exporter                                                   | GTGGCTG <b>A</b> A<br>C                                       | GTGGCTG<br><b>C</b> CAC                                                    |                                                                            |                                                                            |                                                                            |                                                                            |                                                                            |                                                                            |                                                                            |                                                                            |                                                                            |                                                                            |                               |
| <i>yalL</i> | 3743946 &<br>3743948              | 3648     | +        | DUF386 family protein (Note: putative lipase)                                                                  | TATCGATATT<br>C                                               | GAG <b>C</b> GAT<br>ATTC                                                   |                                                                            |                                                                            |                                                                            |                                                                            |                                                                            |                                                                            |                                                                            |                                                                            |                                                                            |                                                                            | GAG <b>C</b> GAT<br>ATTC      |
| <i>lamB</i> | 4248598                           | 4119     | +        | maltose outer membrane porin (maltoporin) (Note: phage lambda receptor protein maltose high-affinity receptor) | ACCCGGG <b>C</b> GG<br>C                                      |                                                                            | ACCCGGG<br><b>C</b> AGC                                                    |                                                                            |                                                                            |                                                                            | ACCCGGG<br><b>C</b> AGC                                                    |                                                                            | ACCCGGG<br><b>C</b> AGC                                                    |                                                                            |                                                                            |                                                                            |                               |
| <i>ssb</i>  | 4274329 &<br>4274336 &<br>4274350 | 4143     | +        | single-stranded DNA-binding protein (Note: ssDNA-binding protein)                                              | GGCG <b>A</b> GCGAA<br>TATCTGCGTA<br>AAGGT <b>T</b> CTCA<br>G | GGCG <b>G</b> GC<br>GAAT <b>G</b> TC<br>TGCGTAA<br>AGGT <b>G</b> CT<br>CAG |                               |
| <i>cadC</i> | 4361346                           | 4220     | -        | cadBA operon transcriptional activator (Note: transcriptional activator of cad operon)                         | ATAGCG <b>C</b> ACC<br>T                                      |                                                                            | ATAGCG <b>T</b><br>ACCT                                                    |                                                                            |                                                                            |                                                                            |                                                                            |                                                                            |                                                                            |                                                                            |                                                                            |                                                                            | ATAGCG <b>T</b><br>ACCT       |
| <i>treB</i> | 4465070                           | 4329     | -        | trehalose-specific PTS enzyme: IIB and IIC component (Note: PTS system enzyme II trehalose specific)           | CCTCT <b>A</b> GAGC<br>G                                      |                                                                            |                                                                            |                                                                            |                                                                            |                                                                            |                                                                            | CCTCT <b>G</b> G<br>AGCG                                                   |                                                                            |                                                                            |                                                                            |                                                                            |                               |
| <i>rob</i>  | 4634844                           | 4490     | -        | right oriC-binding transcriptional activator AraC family (Note: right origin-binding protein)                  | TAC <b>C</b> GCCTTT<br>A                                      |                                                                            |                                                                            |                                                                            |                                                                            | TAC <b>C</b> TCC<br>TTTA                                                   |                                                                            | TAC <b>C</b> TCC<br>TTTA                                                   | TAC <b>C</b> TCC<br>TTTA                                                   |                                                                            |                                                                            |                                                                            |                               |

Table S16 Genes related to bacterial stress in *E. coli* MG1655 after exposure of antidepressants

| Gene        | COG Annotation                                                                                                                                                                                                            | Log <sub>2</sub> Fold Change of FPKM* |                       |                       |                      |                         |                        |
|-------------|---------------------------------------------------------------------------------------------------------------------------------------------------------------------------------------------------------------------------|---------------------------------------|-----------------------|-----------------------|----------------------|-------------------------|------------------------|
|             |                                                                                                                                                                                                                           | Sertraline 1<br>mg/L                  | Sertraline 50<br>mg/L | Duloxetine<br>50 mg/L | Bupropion<br>50 mg/L | Escitalopram<br>50 mg/L | Agomelatine<br>50 mg/L |
| <i>asr</i>  | acid shock-inducible periplasmic protein<br>acid stress protein putative BofA family                                                                                                                                      | -1.56                                 | 9.76                  | 4.17                  | 0.58                 | 1.19                    | -0.03                  |
| <i>ibaG</i> | transcriptional regulator                                                                                                                                                                                                 | -0.49                                 | 1.24                  | -1.45                 | -1.26                | -2.13                   | -1.10                  |
| <i>lexA</i> | transcriptional repressor of SOS regulon                                                                                                                                                                                  | -0.72                                 | -0.03                 | -0.22                 | -0.43                | -0.53                   | -0.56                  |
| <i>lon</i>  | DNA-binding ATP-dependent protease La                                                                                                                                                                                     | -0.02                                 | 2.30                  | 0.53                  | -0.69                | -1.38                   | -0.63                  |
| <i>osmB</i> | osmotically and stress inducible lipoprotein<br>DNA recombination and repair protein ssDNA-<br>dependent ATPase synaptase ssDNA and<br>dsDNA binding protein ATP-dependent<br>homologous DNA strand exchanger recombinase | -0.18                                 | 5.47                  | 1.64                  | -0.80                | -0.88                   | -0.46                  |
| <i>recA</i> | A LexA autocleavage cofactor                                                                                                                                                                                              | -0.46                                 | 1.89                  | 0.39                  | 0.04                 | 0.09                    | 0.05                   |
| <i>recD</i> | exonuclease V (RecBCD complex) alpha chain<br>Rac prophage exonuclease VIII 5' to 3' specific                                                                                                                             | 0.19                                  | 1.17                  | 0.57                  | 0.28                 | 0.86                    | 0.17                   |
| <i>recE</i> | dsDNA exonuclease                                                                                                                                                                                                         | 0.72                                  | 1.42                  | 0.82                  | 0.09                 | 0.11                    | 0.05                   |
| <i>recF</i> | gap repair protein                                                                                                                                                                                                        | -0.29                                 | 2.18                  | 0.15                  | -1.00                | -0.89                   | -0.81                  |
| <i>recN</i> | recombination and repair protein                                                                                                                                                                                          | 0.07                                  | 2.15                  | 0.63                  | 0.06                 | -0.26                   | -0.06                  |
| <i>recX</i> | regulatory protein for RecA                                                                                                                                                                                               | -0.56                                 | 4.28                  | 0.66                  | 0.07                 | -0.32                   | -0.93                  |
| <i>rpoA</i> | RNA polymerase alpha subunit                                                                                                                                                                                              | -0.49                                 | 3.72                  | 0.88                  | -0.01                | 0.70                    | -0.12                  |
| <i>rpoB</i> | RNA polymerase beta subunit                                                                                                                                                                                               | -0.24                                 | 3.36                  | 0.57                  | -0.15                | 0.50                    | -0.36                  |
| <i>rpoC</i> | RNA polymerase beta prime subunit                                                                                                                                                                                         | -0.24                                 | 3.29                  | 0.77                  | -0.04                | 0.72                    | -0.21                  |
| <i>rpoD</i> | RNA polymerase sigma 70 (sigma D) factor                                                                                                                                                                                  | 0.40                                  | 1.66                  | 1.04                  | 0.11                 | -1.18                   | 1.03                   |
| <i>rpoH</i> | RNA polymerase sigma 32 (sigma H) factor                                                                                                                                                                                  | -0.04                                 | 1.91                  | 0.71                  | 0.01                 | -0.17                   | -0.11                  |
| <i>rpoS</i> | RNA polymerase sigma S (sigma 38) factor                                                                                                                                                                                  | 0.20                                  | 2.71                  | 0.57                  | 0.17                 | 0.81                    | -0.30                  |
| <i>spy</i>  | periplasmic ATP-independent protein refolding<br>chaperone stress-induced                                                                                                                                                 | -0.78                                 | 9.15                  | 4.60                  | -0.32                | -0.06                   | -0.90                  |
|             | Cpx stress response Thr/Ser protein kinase MazF                                                                                                                                                                           |                                       |                       |                       |                      |                         |                        |
| <i>srkA</i> | antagonist protein                                                                                                                                                                                                        | -1.45                                 | 1.47                  | -0.40                 | -1.25                | -0.74                   | -1.74                  |
| <i>sulA</i> | SOS cell division inhibitor                                                                                                                                                                                               | -0.14                                 | 1.26                  | -0.05                 | 0.35                 | 0.20                    | -0.06                  |
| <i>ves</i>  | cold- and stress-inducible protein                                                                                                                                                                                        | 0.83                                  | 3.97                  | -0.67                 | -0.54                | -0.20                   | 0.35                   |
| <i>yhbO</i> | stress-resistance protein<br>cadmium and peroxide resistance protein stress-<br>induced                                                                                                                                   | 0.15                                  | 3.87                  | 1.15                  | -0.18                | -0.40                   | -0.39                  |
| <i>yhcN</i> |                                                                                                                                                                                                                           | 1.11                                  | 4.93                  | 3.43                  | 1.85                 | 0.19                    | 4.01                   |
| <i>yjbJ</i> | stress-induced protein UPF0337 family                                                                                                                                                                                     | 1.11                                  | 4.62                  | 2.12                  | 2.02                 | 1.19                    | 0.13                   |



| Gene        | COG Annotation                                                                                                                                               | Log <sub>2</sub> Fold Change of FPKM * |                       |                       |                      |                         |                        |
|-------------|--------------------------------------------------------------------------------------------------------------------------------------------------------------|----------------------------------------|-----------------------|-----------------------|----------------------|-------------------------|------------------------|
|             |                                                                                                                                                              | Sertraline 1<br>mg/L                   | Sertraline 50<br>mg/L | Duloxetine<br>50 mg/L | Bupropion<br>50 mg/L | Escitalopram<br>50 mg/L | Agomelatine<br>50 mg/L |
| <i>umuC</i> | SOS mutagenesis and repair, translesion error-prone DNA polymerase V subunit DNA polymerase activity                                                         | 0.67                                   | 1.09                  | -0.09                 | 0.35                 | -0.03                   | 0.18                   |
| <i>umuD</i> | SOS mutagenesis error-prone repair processed to UmuD' forms complex with UmuC, translesion error-prone DNA polymerase V subunit RecA-activated auto-protease | 0.24                                   | 1.13                  | 0.79                  | 0.79                 | 0.23                    | 0.39                   |

\*: Comparing with the non-antidepressant control group

Table S17 Proteins related to bacterial stress in *E. coli* MG1655 after exposure of antidepressants

| Protein | Description                                          | Log <sub>2</sub> Fold Change of Protein Abundance* |                       |                       |                      |                         |                        |
|---------|------------------------------------------------------|----------------------------------------------------|-----------------------|-----------------------|----------------------|-------------------------|------------------------|
|         |                                                      | Sertraline 1<br>mg/L                               | Sertraline 50<br>mg/L | Duloxetine 50<br>mg/L | Bupropion 50<br>mg/L | Escitalopram<br>50 mg/L | Agomelatine<br>50 mg/L |
| FtsA    | Cell division protein                                | -0.12                                              | 0.44                  | 0.12                  | -0.30                | 0.57                    | -0.30                  |
| FtsN    | Cell division protein                                | 0.43                                               | 0.28                  | 0.30                  | 0.46                 | -0.13                   | 0.21                   |
| FtsP    | Cell division protein                                | 0.04                                               | -0.47                 | -0.38                 | -0.53                | 0.02                    | -0.27                  |
| FtsZ    | Cell division protein                                | -0.05                                              | 0.44                  | 0.20                  | -0.02                | 0.17                    | 0.05                   |
| LexA    | LexA repressor                                       | 0.21                                               | 0.13                  | -0.01                 | 0.22                 | 0.21                    | 0.25                   |
| Lon     | Lon protease                                         | 0.02                                               | 0.45                  | 0.45                  | 0.01                 | 0.21                    | 0.15                   |
| OsmC    | Peroxiredoxin                                        | -0.36                                              | 1.58                  | 0.26                  | -0.02                | 0.66                    | 0.04                   |
| Spy     | Periplasmic chaperone                                | -0.20                                              | -0.77                 | 4.82                  | -0.03                | -0.41                   | 0.12                   |
| SrkA    | Stress response kinase A                             | -0.14                                              | 1.60                  | 0.62                  | -0.25                | 1.50                    | 0.20                   |
| UspA    | Universal stress protein A                           | 0.26                                               | 0.80                  | 0.71                  | 0.39                 | 0.25                    | -0.11                  |
| UspC    | Universal stress protein C                           | 0.04                                               | 0.43                  | 0.25                  | 0.13                 | 0.02                    | 0.33                   |
| UspD    | Universal stress protein D                           | 0.22                                               | 0.40                  | -0.56                 | -0.02                | 0.01                    | -0.28                  |
| YgiC    | Putative acid--amine ligase                          | 0.04                                               | 0.20                  | 0.40                  | 0.01                 | 0.67                    | 0.13                   |
| YgiQ    | UPF0313 protein                                      | -0.11                                              | 0.78                  | 0.61                  | -0.09                | 0.02                    | 0.02                   |
| YgiS    | Probable deoxycholate-binding<br>periplasmic protein | -0.02                                              | -0.03                 | -0.13                 | -0.21                | 0.14                    | 0.10                   |
| YhbT    | SCP2 domain-containing protein                       | -0.46                                              | 1.28                  | 1.58                  | -0.56                | -0.32                   | -0.43                  |
| YhbY    | RNA-binding protein                                  | 0.08                                               | 0.46                  | -0.13                 | 0.58                 | -0.11                   | -0.01                  |
| YhcB    | Inner membrane protein                               | -0.01                                              | 0.09                  | 0.09                  | -0.02                | -2.98                   | 0.03                   |
| YncE    | Uncharacterized protein                              | -0.44                                              | -1.54                 | 4.41                  | 0.09                 | -0.06                   | 0.12                   |

\*: Comparing with the non-antidepressant control group

Table S18 Genes related to bacterial stress in antidepressant sertraline- induced (60 days) mutants, after the exposure of 50 mg/L sertraline

| Gene        | COG Annotation                                                                                                                                                                                     | Log <sub>2</sub> Fold Change of FPKM* |                                 |                                  |                                |                                     |                                  |                                   |                                 |
|-------------|----------------------------------------------------------------------------------------------------------------------------------------------------------------------------------------------------|---------------------------------------|---------------------------------|----------------------------------|--------------------------------|-------------------------------------|----------------------------------|-----------------------------------|---------------------------------|
|             |                                                                                                                                                                                                    | Sertraline 1 mg/L- chloramphenicol    | Sertraline 1 mg/L- tetracycline | Sertraline 1 mg/L- ciprofloxacin | Sertraline 1 mg/L- amoxicillin | Sertraline 50 mg/L- chloramphenicol | Sertraline 50 mg/L- tetracycline | Sertraline 50 mg/L- ciprofloxacin | Sertraline 50 mg/L- amoxicillin |
| <i>asr</i>  | acid shock-inducible periplasmic protein<br>acid stress protein putative Bola family                                                                                                               | 9.81                                  | 9.75                            | 6.39                             | 7.29                           | 4.60                                | 6.20                             | 7.22                              | 6.61                            |
| <i>ibaG</i> | transcriptional regulator                                                                                                                                                                          | 0.04                                  | -0.33                           | -1.41                            | -0.68                          | -1.38                               | -1.33                            | -1.56                             | -1.47                           |
| <i>lexA</i> | transcriptional repressor of SOS regulon<br>DNA-binding ATP-dependent protease                                                                                                                     | -0.26                                 | -0.02                           | -0.11                            | 0.73                           | -0.83                               | 0.24                             | -0.81                             | -0.26                           |
| <i>lon</i>  | La<br>osmotically and stress inducible                                                                                                                                                             | 3.23                                  | -2.68                           | -2.75                            | 2.53                           | 1.32                                | -2.82                            | 1.06                              | 1.18                            |
| <i>osmB</i> | lipoprotein<br>DNA recombination and repair protein<br>ssDNA-dependent ATPase synaptase<br>ssDNA and dsDNA binding protein ATP-<br>dependent homologous DNA strand<br>exchanger recombinase A LexA | 5.35                                  | 3.84                            | 2.94                             | 5.32                           | 2.32                                | 2.22                             | 2.77                              | 1.97                            |
| <i>recA</i> | autocleavage cofactor<br>exonuclease V (RecBCD complex) alpha                                                                                                                                      | 1.18                                  | 0.49                            | 0.45                             | 0.58                           | -0.01                               | 0.44                             | -0.44                             | 0.00                            |
| <i>recD</i> | chain<br>Rac prophage exonuclease VIII 5' to 3'                                                                                                                                                    | 0.93                                  | 0.66                            | 0.63                             | 0.41                           | 0.42                                | 0.51                             | 0.53                              | 0.81                            |
| <i>recE</i> | specific dsDNA exonuclease                                                                                                                                                                         | 2.85                                  | 0.79                            | 0.46                             | 1.32                           | -0.06                               | 0.50                             | 1.12                              | 0.23                            |
| <i>recF</i> | gap repair protein                                                                                                                                                                                 | 3.04                                  | 1.38                            | 2.31                             | 3.47                           | 1.27                                | 1.47                             | 0.98                              | 1.48                            |
| <i>recN</i> | recombination and repair protein                                                                                                                                                                   | 0.66                                  | -0.47                           | -0.30                            | 0.24                           | -1.09                               | -0.47                            | -1.34                             | -1.28                           |
| <i>recX</i> | regulatory protein for RecA                                                                                                                                                                        | 2.11                                  | 0.39                            | 0.07                             | 1.43                           | -0.05                               | -0.74                            | -0.89                             | -0.80                           |
| <i>rpoA</i> | RNA polymerase alpha subunit                                                                                                                                                                       | 2.36                                  | 1.67                            | 1.30                             | 1.40                           | 1.75                                | 0.24                             | 0.41                              | 1.55                            |
| <i>rpoB</i> | RNA polymerase beta subunit                                                                                                                                                                        | 2.25                                  | 1.75                            | 1.18                             | 1.20                           | 1.31                                | 0.81                             | 1.00                              | 1.32                            |
| <i>rpoC</i> | RNA polymerase beta prime subunit<br>RNA polymerase sigma 70 (sigma D)                                                                                                                             | 2.01                                  | 1.81                            | 1.55                             | 1.28                           | 1.72                                | 1.00                             | 1.43                              | 1.73                            |
| <i>rpoD</i> | factor<br>RNA polymerase sigma 32 (sigma H)                                                                                                                                                        | 1.80                                  | 0.59                            | 0.67                             | 2.03                           | 0.78                                | 0.24                             | 0.68                              | 0.92                            |
| <i>rpoH</i> | factor<br>RNA polymerase sigma S (sigma 38)                                                                                                                                                        | 1.65                                  | 1.29                            | 2.06                             | 1.87                           | 1.64                                | 1.47                             | 0.96                              | 0.67                            |
| <i>rpoS</i> | factor                                                                                                                                                                                             | 1.37                                  | 1.13                            | 1.17                             | 1.10                           | 0.85                                | 0.58                             | 0.90                              | 0.81                            |

| Gene        | COG Annotation                                                                                                                                                         | Log <sub>2</sub> Fold Change of FPKM * |                                |                                 |                               |                                    |                                 |                                  |                                |
|-------------|------------------------------------------------------------------------------------------------------------------------------------------------------------------------|----------------------------------------|--------------------------------|---------------------------------|-------------------------------|------------------------------------|---------------------------------|----------------------------------|--------------------------------|
|             |                                                                                                                                                                        | Sertraline 1 mg/L-chloramphenicol      | Sertraline 1 mg/L-tetracycline | Sertraline 1 mg/L-ciprofloxacin | Sertraline 1 mg/L-amoxicillin | Sertraline 50 mg/L-chloramphenicol | Sertraline 50 mg/L-tetracycline | Sertraline 50 mg/L-ciprofloxacin | Sertraline 50 mg/L-amoxicillin |
| <i>spy</i>  | periplasmic ATP-independent protein refolding chaperone stress-induced Cpx stress response Thr/Ser protein                                                             | 9.15                                   | 7.56                           | 6.46                            | 8.13                          | 5.30                               | 5.66                            | 5.03                             | 4.24                           |
| <i>srkA</i> | kinase MazF antagonist protein                                                                                                                                         | 1.80                                   | 0.42                           | 0.52                            | 1.26                          | 0.47                               | 0.26                            | -0.75                            | -0.19                          |
| <i>sulA</i> | SOS cell division inhibitor                                                                                                                                            | 0.89                                   | -0.22                          | -3.33                           | -0.06                         | -1.10                              | -0.26                           | -0.62                            | -0.88                          |
| <i>ves</i>  | cold- and stress-inducible protein                                                                                                                                     | 2.74                                   | -0.44                          | 0.04                            | 1.29                          | -1.50                              | 0.42                            | -0.35                            | -0.94                          |
| <i>yhbO</i> | stress-resistance protein                                                                                                                                              | 2.58                                   | 2.77                           | 0.23                            | 3.08                          | 0.56                               | -0.71                           | 1.14                             | 0.10                           |
| <i>yhcN</i> | cadmium and peroxide resistance protein stress-induced                                                                                                                 | -0.34                                  | 0.48                           | 1.95                            | -0.64                         | 1.65                               | 2.22                            | 1.38                             | 1.70                           |
| <i>yjbJ</i> | stress-induced protein UPF0337 family SOS mutagenesis and repair, translesion error-prone DNA polymerase V subunit                                                     | 5.06                                   | 4.84                           | 4.22                            | 7.08                          | 2.64                               | 3.30                            | 4.33                             | 2.89                           |
| <i>umuC</i> | DNA polymerase activity SOS mutagenesis error-prone repair processed to UmuD' forms complex with UmuC, translesion error-prone DNA polymerase V subunit RecA-activated | 1.38                                   | 0.03                           | -0.28                           | 0.68                          | -1.59                              | -0.08                           | -0.25                            | -0.69                          |
| <i>umuD</i> | auto-protease                                                                                                                                                          | -0.41                                  | -1.14                          | -2.14                           | -0.50                         | -2.01                              | -1.38                           | -1.26                            | -1.17                          |

\*: Comparing with the mutant control group without any sertraline dosage

Table S19 Proteins related to bacterial stress in antidepressant sertraline- induced (60 days) mutants, after the exposure of 50 mg/L sertraline

| Protein | Description                                       | Log <sub>2</sub> Fold Change of FPKM * |                                 |                                  |                                |                                     |                                  |                                   |                                 |
|---------|---------------------------------------------------|----------------------------------------|---------------------------------|----------------------------------|--------------------------------|-------------------------------------|----------------------------------|-----------------------------------|---------------------------------|
|         |                                                   | Sertraline 1 mg/L- chloramphenicol     | Sertraline 1 mg/L- tetracycline | Sertraline 1 mg/L- ciprofloxacin | Sertraline 1 mg/L- amoxicillin | Sertraline 50 mg/L- chloramphenicol | Sertraline 50 mg/L- tetracycline | Sertraline 50 mg/L- ciprofloxacin | Sertraline 50 mg/L- amoxicillin |
| FtsA    | Cell division protein                             | 1.61                                   | 0.45                            | 1.65                             | 2.44                           | -2.08                               | -1.65                            | 0.93                              | 1.27                            |
| FtsN    | Cell division protein                             | -0.23                                  | 0.13                            | -0.21                            | -0.97                          | 0.00                                | 0.22                             | -0.73                             | -0.39                           |
| FtsP    | Cell division protein                             | -0.27                                  | -0.32                           | -0.43                            | -0.37                          | -0.19                               | 0.14                             | 0.14                              | -1.72                           |
| FtsZ    | Cell division protein                             | 0.29                                   | 0.27                            | 0.41                             | 0.79                           | -0.03                               | -0.02                            | -0.34                             | 0.35                            |
| LexA    | LexA repressor                                    | 0.03                                   | -1.23                           | -0.13                            | 0.14                           | -1.88                               | -1.55                            | -2.94                             | 0.04                            |
| Lon     | Lon protease                                      | 1.03                                   | -4.21                           | -2.99                            | 1.09                           | -0.95                               | -3.41                            | -0.99                             | 0.05                            |
| OsmC    | Peroxiredoxin                                     | 1.47                                   | 0.77                            | -0.16                            | 1.32                           | -0.87                               | -0.07                            | -1.28                             | 1.13                            |
| Spy     | Periplasmic chaperone                             | 6.38                                   | 4.93                            | 1.89                             | 5.70                           | 1.60                                | 1.31                             | 1.09                              | 4.76                            |
| SrkA    | Stress response kinase A                          | 0.38                                   | 0.08                            | -0.12                            | 0.53                           | 0.02                                | 0.58                             | -0.14                             | 0.74                            |
| UspA    | Universal stress protein A                        | 0.01                                   | 0.23                            | -0.45                            | -0.11                          | 0.13                                | -0.08                            | 1.61                              | 1.06                            |
| UspC    | Universal stress protein C                        | 1.39                                   | 1.01                            | 1.08                             | 1.85                           | 0.15                                | 2.28                             | 1.38                              | 1.57                            |
| UspD    | Universal stress protein D                        | -1.16                                  | -1.91                           | -0.38                            | -0.30                          | -1.53                               | -1.14                            | -0.65                             | -0.41                           |
| YgiC    | Putative acid--amine ligase                       | -0.01                                  | -0.08                           | -0.14                            | -0.73                          | -0.66                               | -0.66                            | -2.07                             | -0.09                           |
| YgiQ    | UPF0313 protein                                   | 0.97                                   | 0.66                            | 1.28                             | 1.62                           | 0.49                                | 0.94                             | -1.85                             | 0.75                            |
| YgiS    | Probable deoxycholate-binding periplasmic protein | -0.76                                  | -0.47                           | -0.91                            | -0.64                          | 0.99                                | -6.64                            | 3.25                              | 1.23                            |
| YhbT    | SCP2 domain-containing protein                    | 1.29                                   | 1.93                            | 2.23                             | 1.88                           | 0.06                                | 0.22                             | 0.13                              | 1.26                            |
| YhbY    | RNA-binding protein                               | 0.11                                   | 0.32                            | -0.04                            | -0.29                          | 0.89                                | 1.04                             | -0.04                             | 0.44                            |
| YhcB    | Inner membrane protein                            | 0.25                                   | 0.50                            | 0.55                             | 0.64                           | 0.70                                | 1.16                             | 0.98                              | 0.76                            |
| YncE    | Uncharacterized protein                           | 0.45                                   | -0.65                           | -0.46                            | 0.67                           | -0.12                               | -0.57                            | -0.32                             | -0.04                           |

\*: Comparing with the mutant control group without any sertraline dosage

Table S20 Quantified mathematical parameters and calibrated results of resistant bacteria evolution after exposure of antidepressants

|              |          | $K_m$             | $\mu_W$ | $\mu_R$ | $d_W$ | $d_R$ | $\lambda_1$           | $\lambda_2$           | $\eta_1$             | $\eta_2$             |
|--------------|----------|-------------------|---------|---------|-------|-------|-----------------------|-----------------------|----------------------|----------------------|
| Control      |          | $4.8 \times 10^8$ | 0.158   | 0.106   | 0.03  | 0.035 | $1.0 \times 10^{-10}$ | $1.0 \times 10^{-10}$ | $1.0 \times 10^{-9}$ | $1.0 \times 10^{-9}$ |
|              | 0.1 mg/L | $2.2 \times 10^8$ | 0.161   | 0.131   | 0.03  | 0.035 | $8.0 \times 10^{-6}$  | $1.0 \times 10^{-7}$  | $5.0 \times 10^{-4}$ | $4.5 \times 10^{-5}$ |
| Sertraline   | 1 mg/L   | $2.2 \times 10^8$ | 0.159   | 0.122   | 0.031 | 0.036 | $6.0 \times 10^{-6}$  | $2.0 \times 10^{-7}$  | $3.5 \times 10^{-4}$ | $6.0 \times 10^{-5}$ |
|              | 10 mg/L  | $2.2 \times 10^8$ | 0.155   | 0.167   | 0.034 | 0.038 | $5.0 \times 10^{-6}$  | $1.0 \times 10^{-7}$  | $2.0 \times 10^{-4}$ | $3.0 \times 10^{-5}$ |
|              | 50 mg/L  | $2.2 \times 10^8$ | 0.151   | 0.126   | 0.035 | 0.039 | $2.0 \times 10^{-6}$  | $5.0 \times 10^{-7}$  | $1.0 \times 10^{-4}$ | $9.0 \times 10^{-5}$ |
|              | 0.1 mg/L | $3.5 \times 10^8$ | 0.16    | 0.181   | 0.03  | 0.035 | $5.0 \times 10^{-6}$  | $3.0 \times 10^{-7}$  | $9.0 \times 10^{-4}$ | $6.0 \times 10^{-5}$ |
| Duloxetine   | 1 mg/L   | $3.5 \times 10^8$ | 0.161   | 0.177   | 0.031 | 0.036 | $1.0 \times 10^{-6}$  | $2.0 \times 10^{-7}$  | $5.0 \times 10^{-4}$ | $8.0 \times 10^{-5}$ |
|              | 10 mg/L  | $3.5 \times 10^8$ | 0.156   | 0.179   | 0.033 | 0.038 | $3.0 \times 10^{-6}$  | $3.0 \times 10^{-7}$  | $3.0 \times 10^{-4}$ | $5.0 \times 10^{-5}$ |
|              | 50 mg/L  | $3.5 \times 10^8$ | 0.153   | 0.184   | 0.036 | 0.04  | $1.0 \times 10^{-7}$  | $6.0 \times 10^{-7}$  | $1.0 \times 10^{-4}$ | $8.0 \times 10^{-5}$ |
|              | 0.1 mg/L | $4.2 \times 10^8$ | 0.159   | 0.182   | 0.036 | 0.037 | $3.0 \times 10^{-6}$  | $5.0 \times 10^{-7}$  | $5.5 \times 10^{-4}$ | $8.0 \times 10^{-5}$ |
| Bupropion    | 1 mg/L   | $4.2 \times 10^8$ | 0.165   | 0.121   | 0.038 | 0.037 | $4.0 \times 10^{-6}$  | $5.5 \times 10^{-7}$  | $6.4 \times 10^{-4}$ | $4.0 \times 10^{-5}$ |
|              | 10 mg/L  | $4.2 \times 10^8$ | 0.153   | 0.132   | 0.032 | 0.038 | $6.5 \times 10^{-6}$  | $4.0 \times 10^{-7}$  | $5.0 \times 10^{-4}$ | $5.0 \times 10^{-5}$ |
|              | 100 mg/L | $4.2 \times 10^8$ | 0.15    | 0.149   | 0.030 | 0.037 | $5.5 \times 10^{-6}$  | $3.0 \times 10^{-7}$  | $7.0 \times 10^{-4}$ | $6.0 \times 10^{-5}$ |
|              | 0.1 mg/L | $3.2 \times 10^8$ | 0.158   | 0.161   | 0.032 | 0.039 | $3.6 \times 10^{-6}$  | $6.0 \times 10^{-7}$  | $6.0 \times 10^{-4}$ | $6.0 \times 10^{-5}$ |
| Escitalopram | 1 mg/L   | $3.2 \times 10^8$ | 0.161   | 0.152   | 0.037 | 0.036 | $5.1 \times 10^{-6}$  | $5.0 \times 10^{-7}$  | $5.0 \times 10^{-4}$ | $4.0 \times 10^{-5}$ |
|              | 10 mg/L  | $3.2 \times 10^8$ | 0.159   | 0.185   | 0.036 | 0.036 | $2.0 \times 10^{-6}$  | $4.0 \times 10^{-7}$  | $5.0 \times 10^{-4}$ | $5.0 \times 10^{-5}$ |
|              | 100 mg/L | $3.2 \times 10^8$ | 0.145   | 0.134   | 0.034 | 0.037 | $4.0 \times 10^{-6}$  | $3.5 \times 10^{-7}$  | $4.0 \times 10^{-4}$ | $3.0 \times 10^{-5}$ |
|              | 0.1 mg/L | $4.5 \times 10^8$ | 0.151   | 0.190   | 0.037 | 0.037 | $6.0 \times 10^{-6}$  | $2.0 \times 10^{-7}$  | $3.0 \times 10^{-4}$ | $5.5 \times 10^{-5}$ |
| Agomelatine  | 1 mg/L   | $4.5 \times 10^8$ | 0.176   | 0.128   | 0.033 | 0.038 | $2.0 \times 10^{-6}$  | $6.0 \times 10^{-7}$  | $2.0 \times 10^{-4}$ | $4.5 \times 10^{-5}$ |
|              | 10 mg/L  | $4.5 \times 10^8$ | 0.161   | 0.124   | 0.034 | 0.038 | $8.0 \times 10^{-6}$  | $4.0 \times 10^{-7}$  | $6.0 \times 10^{-4}$ | $6.0 \times 10^{-5}$ |
|              | 100 mg/L | $4.5 \times 10^8$ | 0.165   | 0.164   | 0.035 | 0.036 | $6.5 \times 10^{-6}$  | $5.0 \times 10^{-7}$  | $5.0 \times 10^{-4}$ | $5.0 \times 10^{-5}$ |

Table S21 Summary of mutation rate calculated by the Luria-Delbrück fluctuation method

|                  | Mutation rate ( $\mu$ )        | $\mu_{95-}$                     | $\mu_{95+}$                    |
|------------------|--------------------------------|---------------------------------|--------------------------------|
| WT               | $7.25 \pm 1.75 \times 10^{-9}$ | $2.31 \pm 3.86 \times 10^{-10}$ | $1.00 \pm 0.26 \times 10^{-8}$ |
| WT_Ser (10 mg/L) | $2.00 \pm 0.29 \times 10^{-8}$ | $5.56 \pm 1.09 \times 10^{-9}$  | $1.73 \pm 0.32 \times 10^{-8}$ |

Note:  $\mu_{95-}$  and  $\mu_{95+}$  represent 95% confidence intervals for the mutation rate

## Supplementary Texts

Text S1 Whole-genome DNA sequencing of mutant strains and single nucleotide polymorphisms (SNPs) calling

Bacterial genomic DNA was extracted by the Genomic DNA isolation kit (Sigma-Aldrich, USA) according to the manufacturer's protocol. Biological triplicate of the extracted DNA samples were submitted to Novogene Co., Ltd (Singapore) for library preparation and Illumina paired-end sequencing (HiSeq 2500, Illumina Inc, San Diego, CA). SNP calling was based on the standard best practice guide of Genome Analysis Toolkit (GATK, v4.1.4.1). Particularly, sequencing data were first converted to unmapped Binary Alignment Map (BAM) format. The sequenced reads in each sample were also mapped to *E. coli* MG1655 genome sequence (obtained from National Center for Biotechnology Information (NCBI), NC\_000913.3) by mem command of BWA (v0.7.17-r1188), after which the mapped BAM files were output. Unmapped and mapped BAM files were merged and sorted by mapped coordinates, which output alignment files.

Duplicates in the alignments were then marked. Duplicate marked alignments were used for the first run of SNP calling without Base Quality Score Recalibration (BQSR). BQSR is a critical pre-processing step in GATK pipeline that detects systematic sequencing errors and hence improves the accuracy of SNP calling. This step needs the known SNP sites to build a statistic model. As no such data were found for *E. coli*, a circling strategy was thus employed to generate such a data set. In particular, BQSR was performed using the first call as the initial known sites. Recalibrated alignments were employed for the second run of SNP calling. This procedure was repeated to obtain the stabilized fourth run of SNP calling which was used as the final set of SNP calls. Annotation of SNPs was conducted by Annovar (2019-12-06 release) (2). The obtained SNPs in each mutant strain were compared with those in the biological triplicate control group, and different nonsynonymous SNPs were regarded as where mutation happened.

Text S2 Whole-genome mRNA sequencing under the exposure of antidepressants

Bacterial total was extracted using RNeasy Mini Kit (QIAGEN®, Germany) except the protocol included an extra bead-beating step for cell lysis. Biological triplicate of the extracted RNA samples were submitted to Novogene Co., Ltd (Hong Kong, China) for library preparation and Illumina paired-end sequencing (HiSeq 2500, Illumina Inc, San Diego, CA). Gene expression levels between the antidepressant-dosed samples and the corresponding control sample were compared according to the bioinformatic pipeline. In detail, the raw sequencing data were analyzed by applying NGS QC Toolkit (v2.3.3), SeqAlto (version 0.5), and Cufflinks (version 2.2.1). The database used for alignment was the reference genome of *E. coli* MG1655 (obtained from NCBI, NC\_000913.3). CummeRbund package in R was used to conduct the statistical analyses. The measure of “fragments per kilobase of a gene per million mapped reads” (FPKM) was applied to quantify gene expression. Significant differences were seen when both the *p* value and false discovery rate (*q* value) were less than 0.05.

Text S3 Genome-wide proteomic analyses under the exposure of antidepressants



Bacterial total protein was digested in S-Trap filters (ProtiFi, Huntington, USA) according to the manufacturer's procedure. The digested peptides were analyzed by the Liquid chromatography-tandem mass spectrometry (LC-MS/MS), which was performed using a Dionex Ultimate 3000 RSLCnano-LC system coupled to a Q-Exactive<sup>TM</sup> H-X Hybrid Quadrupole-Orbitrap<sup>TM</sup> mass spectrometer (Thermo Scientific<sup>TM</sup>). Raw sequencing data were processed by applying Thermo Proteome Discoverer (version 2.2.0.388) towards the database of *E. coli* MG1655 (received from UniProt on 12<sup>th</sup> of July 2019). Abundance ratios of each protein between antidepressant-dosed samples and the corresponding control sample were calculated. A stringency cut-off of  $q$  value less than 0.01 was applied to identify the proteins with significantly different expression levels.

#### Text S4 Quantifying mathematical modeling parameters and model simulation

In detail, 1% of the stock bacteria solution was transferred to LB broth in a 96-well plate, containing antidepressants sertraline or duloxetine with a final concentration of 0.1, 1, 10, and 50 mg/L. LB broth without any antidepressant was the control group. The 96-well plates were then incubated at 30 °C, and OD<sub>600</sub> values were measured every 10 minutes or hourly by a plate reader (CLARIOstar<sup>plus</sup>, BMG Labtech, Germany). Biological triplicate experiments were conducted under each condition.

#### Text S5 Fluctuation test

The overnight cultured wild type *E. coli* MG1655 was diluted to 10<sup>3</sup> cell per mL in the fresh LB medium and 200  $\mu$ L of cell suspension was uploaded onto a 96-well plate (Figure S7). The plate was covered with a plate seal to minimize evaporation and was incubated at 37 °C until the OD<sub>600</sub> value reached 0.4~0.6. For each 96-well plate, 60 wells were pooled with cell suspension, while the border wells (36 wells) were filled with LB media only (no contamination). Among the wells with bacterial cells, 57 of the cultures were plated (the entire volume) on LB agar that contained phage vB\_EcoM\_LNA6 (isolated from a full-scale wastewater treatment plant in Brisbane, Australia) (3), while other 3 of the cultures were plated onto LB agar without phage to enumerate the total cell number. The cultures were mixed with phage in agarose before pooling onto the LB agar plates. All the plates were incubated for 1-2 days at 37 °C until colonies were large enough to count. Each plate was run in biological triplicate.

#### References:

1. Rosche WA & Foster PL (2000) Determining mutation rates in bacterial populations. *Methods* 20(1):4-17.
2. Wang K, Li M, & Hakonarson H (2010) ANNOVAR: functional annotation of genetic variants from high-throughput sequencing data. *Nucleic acids research* 38(16):e164-e164.
3. Ngiam L, Weynberg KD, & Guo J (2022) The presence of plasmids in bacterial hosts alters phage isolation and infectivity. *ISME Communications* 2(1):1-11.
